1  
2  
3  
4  
5  
6  
7  
8  
9  
10  
11  
12  
13  
14  
15  
16  
17  
18

## **Nitric oxide negatively regulates gibberellin signaling to coordinate growth and salt tolerance in *Arabidopsis***

Lichao Chen,<sup>1,2,3\*</sup> Shuhao Sun,<sup>1,2,3</sup> Chun-Peng Song,<sup>4</sup> Jian-Min Zhou<sup>1,2,5</sup>, Jiayang Li<sup>1,2,5</sup> and Jianru Zuo<sup>1,2,3,5,6\*</sup>

<sup>1</sup>State Key Laboratory of Plant Genomics, Institute of Genetics and Developmental Biology, Chinese Academy of Sciences, Beijing 100101, China. <sup>2</sup>College of Advanced Agricultural Sciences, University of Chinese Academy of Sciences, Beijing 100049, China. <sup>3</sup>CAS Center for Excellence in Molecular Plant Sciences, Chinese Academy of Sciences, Beijing 100101, China. <sup>4</sup>State Key Laboratory of Crop Stress Adaptation and Improvement, Collaborative Innovation Center of Crop Stress Biology, Henan University, Kaifeng 475001, China. <sup>5</sup>Hainan Yazhou Bay Seed Laboratory, Sanya, 572025, China

<sup>6</sup>Lead Contact

\*Correspondence: [lcchen@genetics.ac.cn](mailto:lcchen@genetics.ac.cn) and [jrzuo@genetics.ac.cn](mailto:jrzuo@genetics.ac.cn)

19 **Summary**

20  
21 **In response to dynamically altered environments, plants must finely coordinate the balance**  
22 **between growth and stress responses for their survival. However, the underpinning**  
23 **regulatory mechanisms remain largely elusive. The phytohormone gibberellin promotes**  
24 **growth via a derepression mechanism by proteasomal degradation of the DELLA**  
25 **transcription repressors. Conversely, the stress-induced burst of nitric oxide (NO) enhances**  
26 **stress tolerance, largely relaying on NO-mediated S-nitrosylation, a redox-based**  
27 **posttranslational modification. Here, we show that S-nitrosylation of Cys-374 in the**  
28 ***Arabidopsis* RGA protein, a key member of DELLAs, inhibits its interaction with the F-box**  
29 **protein SLY1, thereby preventing its proteasomal degradation under salinity condition. The**  
30 **accumulation of RGA consequently retards growth but enhances salt tolerance . We**  
31 **propose that NO negatively regulates gibberellin signaling via S-nitrosylation of RGA to**  
32 **coordinate the balance of growth and stress responses when challenged by adverse**  
33 **environments.**

34  
35 **Key words: gibberellin; nitric oxide; S-nitrosylation; DELLA repressors; stress responses**

36  
37

## 38 INTRODUCTION

39  
40 To survive under fluctuating environments and unfavorable conditions, plants have evolved  
41 sophisticated mechanisms to cope with abiotic and biotic stresses (Zhou and Zhang, 2020; Zhu,  
42 2016). Because available resources are limited and detrimental effects are imposed on plants by  
43 stress responses, tradeoff or fine-tuned balance between defense and growth is tightly controlled  
44 to allow better fitness for plants (Belda-Palazon et al., 2020; Smakowska et al., 2016; Verma et  
45 al., 2016; Yang et al., 2012). However, how plants coordinate growth and stress tolerance is  
46 poorly understood.

47 Phytohormones are key regulators modulating growth and stress tolerance in plants. Among  
48 those, gibberellin is a classic growth-promotion phytohormone that regulates a wide range of  
49 plant growth and developmental processes, including seed germination, root development,  
50 hypocotyl elongation, and flowering (Achard et al., 2007; Debeaujon and Koornneef, 2000;  
51 Huang et al., 2010; Shu et al., 2014; Ubeda-Tomas et al., 2008; Wilson et al., 1992). Gibberellin  
52 signaling is initiated by binding of the phytohormone to its receptor GA-INSENSITIVE  
53 DWARF1 (GID1). The activated GA-GID1 complex interacts with DELLAs to promote their  
54 association with the F-box protein SLEEPY1 (SLY1), eventually facilitating the proteasomal  
55 degradation of the repressor proteins (Daviere and Achard, 2013; Sun, 2011; Xu et al., 2014). The  
56 *Arabidopsis* genome contains a small gene family of 5 members encoding DELLA repressor  
57 proteins, namely GA-INSENSITIVE (GAI), REPRESSOR-OF-*gal-3* (RGA), RGA-LIKE1  
58 (RGL1), RGL2, and RGL3. Among those, *RGA* and *GAI* are major members of this small gene  
59 family, as mutations in these two repressors rescue the growth retardation phenotype of *sly1-10*  
60 mutant (Dill et al., 2004).

61 Extensive studies during the past decades have characterized DELLAs as key regulators of  
62 gibberellin signaling. DELLAs also act as links to connect with other signaling pathways.  
63 Notably, DELLAs physically interact with PHYTOCHROME-INTERACTING FACTOR,  
64 BRASSINAZOLE-RESISTANT1, and ETHYLENE INSENSITIVE3, to integrate signals of light

65 and other phytohormones in coordinating plant growth (Achard et al., 2009; An et al., 2012; Bai  
66 et al., 2012; de Lucas et al., 2008; Feng et al., 2008; Ubeda-Tomas et al., 2009). In addition to the  
67 modulation of plant growth and development, DELLAs have also been found to regulate stress  
68 responses. While DELLA protein SiGAI4 positively regulates cold tolerance in tomato (Wang et  
69 al., 2020a) and the *Arabidopsis* gain-of-function mutant *gai-1* displays increased drought  
70 tolerance (Wang et al., 2020b), the *Arabidopsis gai-t6 rga-24* double mutant is sensitive to salt  
71 treatment (Achard et al., 2006). DELLA proteins also interact with JASMONATE-ZIM  
72 DOMAIN (JAZ) to retard the JAZ-MYC2 interaction, thereby enhancing the activity of MYC2 to  
73 modulate biotic stress responses (Hou et al., 2010).

74 Stress responses in plants are more often regulated by the stress-related phytohormones and  
75 other signaling molecules, including nitric oxide (NO). As an important signaling molecule, NO  
76 plays a vital role in regulating various physiological processes in all living organisms. In plants,  
77 NO regulates a wide range of biological processes, including flowering, reproductive  
78 development, seed germination, root and shoot development as well as responses to biotic and  
79 abiotic stresses (Duan et al., 2020; Fernandez-Marcos et al., 2011; He et al., 2004; Yu et al.,  
80 2014). The major bioactive NO species is *S*-nitrosoglutathione (GSNO) that is irreversibly  
81 degraded by the highly conserved GSNO reductase (GSNOR) (Liu et al., 2001). In *Arabidopsis*,  
82 mutations in the single-copied *GSNOR1* gene cause the accumulation of excessive amount of NO  
83 species, resulting in severe defects in development and stress responses (Chen et al., 2009;  
84 Feechan et al., 2005; Kwon et al., 2012; Lee et al., 2008). NO executes its physiological effects  
85 mainly through protein *S*-nitrosylation, a redox-based posttranslational modification by the  
86 addition of an NO molecule to the thiol group of cysteine residue (Cys) to form *S*-nitrosothiol  
87 (SNO) (Feng et al., 2019; Hess et al., 2005; Stamler et al., 1992). Protein *S*-nitrosylation  
88 modulates diverse functions of proteins, including enzymatic activities, subcellular localization,  
89 stability, and protein-protein interactions. In higher plants, mainly in *Arabidopsis*, a number of *S*-  
90 nitrosylated proteins have been reported to regulate various developmental processes, immune  
91 responses, stress responses, and phytohormone signaling (Astier et al., 2011; Feng et al., 2019;

92 Yu et al., 2014).

93       The interplay between NO and phytohormone signaling has been studied in some degrees.  
94 In *Arabidopsis*, *S*-nitrosylation of the auxin receptor TIR1 enhances its interaction with the  
95 transcriptional repressors Aux/IAA to promote their proteasomal degradation (Terrile et al.,  
96 2012). In the cytokinin pathway, while *S*-nitrosylation of a histidine phosphotransfer protein  
97 negatively regulates the phosphorelay, leading to a compromised cytokinin response (Feng et al.,  
98 2013), NO chemically reacts with cytokinins to regulate the cellular homeostasis of NO (Liu et  
99 al., 2013), illustrating a fine-tuned reciprocal regulatory mechanism between these two classes of  
100 signaling molecules. In gibberellin signaling, the NO donor sodium nitroprusside (SNP) induces  
101 the accumulation of DELLAs (Lozano-Juste and Leon, 2011). Moreover, in response to  
102 environmental stress, *S*-nitrosylation of OST1 and ABI5 negatively modulates abscisic acid  
103 signaling (Albertos et al., 2015; Wang et al., 2015). These studies highlight the importance of  
104 NO-mediated *S*-nitrosylation in regulating both growth and stress responses in plants.

105       In spite of these efforts, the molecular mechanism regulating the balance between plant  
106 growth and stress responses remains largely elusive. In this study, we report that NO induces the  
107 *S*-nitrosylation of *Arabidopsis* DELLA protein RGA at Cys-374, which causes the inhibition of  
108 the RGA-SLY1 interaction, thereby stabilizing the RGA repressor protein to coordinate plant  
109 growth and abiotic stress responses.

110

111

## 112 **Results**

113

### 114 **Nitric oxide negatively regulates gibberellin signaling via DELLA repressors**

115 Gibberellin mainly promotes plant growth, a biological effect opposite to that of NO. To explore  
116 the possible interaction between the NO and gibberellin pathways, we tested the responses of  
117 *Arabidopsis* to these two signaling molecules. While gibberellin promoted the elongation of roots  
118 and hypocotyls, the NO donor sodium nitroprusside (SNP) inhibited the growth of roots and had  
119 no apparent effect on the elongation of hypocotyls (Figure 1A and 1B). The lack of inhibitory  
120 effect on hypocotyl elongation is likely attributed to the relatively low concentrations of SNP  
121 used in the assay. Nevertheless, SNP antagonized the growth-promotion effect of gibberellin in a  
122 dose-dependent manner (Figure 1A and 1B). Treatment with GNSO showed a similar phenotype  
123 (Supplemental Figure 1A-1B). Consistent with these observations, the *gsnor1-3* mutant, which  
124 accumulates excessive amount of GSNO (Chen et al., 2009; Feechan et al., 2005; Lee et al.,  
125 2008), was nearly insensitive to gibberellin for the promotion effect on the elongation of  
126 hypocotyls (Figure 1C). Notably, gibberellin reduced the root growth of *gsnor1-3*, a phenotype  
127 opposite to that wild type (Figure 1D). These results suggest that NO antagonizes the gibberellin-  
128 promoted growth effect.

129 We reasoned that NO may target DELLA repressor proteins to modulate gibberellin  
130 signaling. To test this possibility, we examined the response of mutants carrying various  
131 mutations in the *Arabidopsis* DELLA genes to NO. *Arabidopsis* has five DELLA genes, of which  
132 *RGA* and *GAI* are two major members (Dill et al., 2004; Schwechheimer and Willige, 2009; Xu et  
133 al., 2014). Among the analyzed mutants, *rga*, a T-DNA insertion mutant (SALK\_089146), carries  
134 a null mutation (Supplemental Figure 2A-2C) and *della* is a quadruple mutant carrying null  
135 mutations in *RGA*, *GAI*, *RGL1*, and *RGL2* (Cheng et al., 2004). Under normal growth conditions,  
136 the *rga* mutant did not have detectable phenotype (Supplemental Figure 2D). However, the *rga*  
137 mutant was insensitive to the inhibitory effect of SNP on the elongation of hypocotyls (Figure  
138 1E). Similarly, both the *gai-t6 rga-24* double mutant and *della* quadruple mutant were

139 hyposensitive to SNP (Figure 1F and 1G). These results suggest that NO negatively regulates  
140 gibberellin signaling in a *DELLA*-dependent manner.

141

### 142 **Nitric oxide inhibits RGA-SLY1 interaction to stabilize RGA**

143 Data presented above suggest that NO negatively regulates the gibberellin response via *DELLA*  
144 genes. We found that the transcription of *RGA* and key gibberellin biosynthesis genes was nearly  
145 unaltered when treated with *S*-nitrosoglutathione (GSNO) or SNP (Supplemental Figure 3A-B).  
146 Because the gibberellin-induced degradation of DELLA is a key step for the activation of  
147 gibberellin signaling, it is reasonable to assume that NO directly or indirectly regulates this class  
148 of repressor proteins. We then analyzed the regulation of NO on DELLA proteins. A *pRGA::GFP-*  
149 *RGA* transgenic line (Silverstone et al., 2001) was used to analyze the accumulation of RGA  
150 protein in response to NO. When treated with GSNO or SNO, the subcellular localization of  
151 GFP-RGA did not have detectable alterations (Supplemental Figure 3C). However, the  
152 accumulation of GFP-RGA protein was substantially increased by GSNO or SNP in a dose-  
153 dependent manner (Figure 2A and Supplemental Figure 3D). A time-course experiment revealed  
154 that the accumulation of GFP-RGA was progressively increased upon longer treatment with  
155 GSNO or SNP (Figure 2B and Supplemental Figure 3E). Consistent with these observations, the  
156 accumulation of RGA protein was significantly higher in NO over-accumulating mutant *gsnor1-3*  
157 and *nox1* (He et al., 2004) than that in wild type (Figure 2C), suggesting that NO positively  
158 regulates the stability of RGA. Remarkably, the gibberellin-induced degradation of RGA protein  
159 was nearly abolished by GSNO or SNP (Figure 2D and Supplemental Figure 3F), suggesting that  
160 NO inhibits gibberellin-promoted degradation of RGA protein.

161 Upon binding to gibberellin, the activated GID1 receptor interacts with DELLA proteins to  
162 promote their association with the F-box protein SLY1, thereby facilitating the proteasomal  
163 degradation of the repressor proteins. To test if NO regulates the interaction between RGA-GID1  
164 or RGA-SLY1, we performed the following experiments. We found that RGA recombinant  
165 protein physically interacted with SLY1 recombinant protein in a pull-down assay and the RGA-

166 SLY1 interaction was reduced by GSNO in a dose-dependent manner (Figure 2E). A bimolecular  
167 fluorescence complementation (BiFC) assay also revealed that NO reduced the RGA-SLY1  
168 interaction *in planta* (Figure 2F). Notably, the RGA-GID1 interaction is not regulated by NO  
169 (Supplemental Figure 4A and 4B). Taken together, these results suggest that NO positively  
170 regulates the stability of RGA by inhibiting its interaction with the F-box protein SLY1.

171

### 172 **S-nitrosylation of RGA at Cys-374 inhibits its proteasomal degradation**

173 A major physiological role of NO is executed through protein *S*-nitrosylation. We then asked if  
174 RGA was posttranslationally modified by NO. We found that GSNO induced *S*-nitrosylation of  
175 RGA recombinant protein in an *in vitro* biotin-switch assay (Figure 3A). Similarly, GAI, RGL1,  
176 RGL2, and RGL3 recombinant proteins were also found being modified by *S*-nitrosylation  
177 (Supplemental Figure 5A-5D), suggesting that *S*-nitrosylation plays an important role in  
178 regulating DELLA proteins. Moreover, GFP-RGA protein was also found to be *S*-nitrosylated in  
179 *planta* (Figure 3B). Among 10 Cys residues in RGA, a mass spectrometric analysis of RGA  
180 recombinant protein identified Cys-249, Cys-374, Cys-506, and Cys-564 as *S*-nitrosylated  
181 residues (Figure 3C and Supplemental Table 1). In two replicates of mass spectrometry, four  
182 other Cys residues (Cys-228, Cys-286, Cys-299, and Cys-501) have also been covered, in which  
183 no modification was detected. However, Cys-129 and Cys-168 were not covered in mass  
184 spectrometry. We could not exclude the possibility that these two Cys residues are modified by *S*-  
185 nitrosylation. Because transgenic studies showed that mutations only in Cys-374, but not in Cys-  
186 249, Cys-506, and Cys-564, showed detectable effects under stress growth conditions (see  
187 below), we focused the analysis of Cys-374 hereafter and the functional studies of other *S*-  
188 nitrosylated Cys residues will be published elsewhere. Notably, Cys-374 is conserved in RGA  
189 and GAI, but not in other DELLA proteins, suggestive of possible functional divergence of these  
190 transcriptional repressors. The substitution of Cys-374 with Ser (RGA<sup>C374S</sup>) reduced the *S*-  
191 nitrosylation of the mutant protein *in vitro* and *in planta* (Figure 3D and 3E), indicating that Cys-  
192 374 is modified by *S*-nitrosylation.



193 Because the interaction of RGA with SLY is negatively regulated by NO, we reasoned that  
194 the RGA-SLY interaction might be regulated by *S*-nitrosylation. While the RGA-SLY1  
195 interaction was reduced by GSNO, this negative effect was abolished by a *RGA*<sup>C374S</sup> mutation in a  
196 pull-down assay (Figure 3F). Moreover, the interaction of SLY1 and RGA was detected by a co-  
197 immunoprecipitation (Co-IP) assay when transiently expressed in tobacco (*Nicotiana tabacum*)  
198 leaves harboring *HA-SLY1* and *FLAG-RGA* or *FLAG-RGA*<sup>C374S</sup> constructs and the interaction was  
199 inhibited by SNP. However, SNP exerts NO inhibitory effect on *RGA*<sup>C374S</sup>-SLY1 interaction (Fig  
200 3G). Collectively, these results suggest that *S*-nitrosylation at Cys-374 negatively regulates the  
201 RGA-SLY1 interaction. Consistent with this observation, the SNP-induced accumulation of GFP-  
202 RGA protein was abolished by the *RGA*<sup>C374S</sup> mutation (Figure 3H). Moreover, the gibberellin-  
203 induced degradation of RGA was inhibited by SNP and GSNO in RGA, but not in *RGA*<sup>C374S</sup>  
204 mutant proteins (Figure 3I and 3J), suggesting that Cys-374 confers the responsiveness of RGA  
205 to NO. These results suggest that *S*-nitrosylation of RGA at Cys-374 inhibits its interaction with  
206 the F-box protein SLY1, thereby preventing its proteasomal degradation.

207

### 208 ***S*-nitrosylation of RGA at Cys-374 coordinates plant growth and stress responses**

209 Given the importance of *S*-nitrosylation in regulating the stability of RGA, we next explored its  
210 physiological significance in modulating growth and stress responses. To this end, a *pRGA::GFP-*  
211 *RGA*<sup>C374S</sup> transgene and its control *pRGA::GFP-RGA* were introduced into the *gai-t6 rga-24*  
212 double mutant by genetic transformation. The *gai-t6 rga-24* double mutant showed elongated  
213 hypocotyls and primary roots under normal growth conditions and this phenotype was fully  
214 rescued by both *pRGA::GFP-RGA* and *pRGA::GFP-RGA*<sup>C374S</sup> transgenes (Figure 4A-4C and  
215 Supplemental Figure 1B). Moreover, these two transgenes also fully rescued the sensitivity of the  
216 *gai-t6 rga-24* double mutant to gibberellin (Figure 4A-4C and Supplemental Figure 1A).  
217 However, the response of *gai-t6 rga-24* to SNP and GSNO, regardless of the presence or the  
218 absence of gibberellin, was only rescued by *pRGA::GFP-RGA*, but not by *pRGA::GFP-RGA*<sup>C374S</sup>  
219 (Figure 4A-4C, Supplemental Figure 1), consistent with the observation that the accumulation of

220 RGA, but not RGA<sup>C374S</sup>, was sensitive to SNP and GSNO (see Figure 3H-3J). These results  
221 suggest that *S*-nitrosylation of RGA at Cys-374 plays an important role in regulating gibberellin  
222 signaling.

223 While NO is a key regulator of stress responses (Astier et al., 2011; Feng et al., 2019; Yu et  
224 al., 2014), gibberellin signaling is also implied to play a role in salt tolerance, evidenced by the  
225 observation that the *gai-t6 rga-24* mutant is hypersensitive to NaCl (Achard et al., 2006). We then  
226 asked if *S*-nitrosylation of RGA is involved in regulating stress responses. We found that the  
227 hypersensitivity of *gai-t6 rga-24* to NaCl was restored by *pRGA::GFP-RGA*, but not by  
228 *pRGA::GFP-RGA<sup>C374S</sup>* (Figure 4D-4E). This phenotype was correlated to the accumulation of  
229 RGA and RGA<sup>C374S</sup> proteins in response to NaCl (Figure 4F), in a manner similar to that of SNP  
230 (see Figure 3H), suggesting that *S*-nitrosylation of RGA at Cys-374 is essential for its  
231 responsiveness to a stress signal. Taken together, these results suggest that *S*-nitrosylation of RGA  
232 modulates gibberellin signaling and stress tolerance to coordinate plant growth in response to  
233 variable environmental conditions (Figure 4G).

234

## 235 **Discussion**

236  
237 In this study, we find that NO negatively regulates gibberellin signaling by stabilizing the RGA  
238 repressor via *S*-nitrosylation, which retards growth but positively modulates stress tolerance, thus  
239 uncovering a unique mechanism balancing the growth and survival of plants (Figure 4G). While  
240 gibberellin is a key regulator promoting plant growth in most, if not all, developmental stages, the  
241 burst of NO is generally believed as a hallmark at the onset of stress responses. When challenged  
242 by environmental stress, plants usually respond by the inhibition of growth and the activation of  
243 stress responses to cope with the detrimental growth conditions. It has been recognized that NO  
244 boosts stress tolerance via *S*-nitrosylation of key components of stress responses (Albertos et al.,  
245 2015; Hu et al., 2017; Wang et al., 2015; Yang et al., 2015). Also as a protective mechanism,  
246 stresses promote the accumulation of DELLA proteins, mediated by decreasing the biosynthesis  
247 of gibberellins (Achard et al., 2006; Wang et al., 2020b) or repressing the transcription of *SLY1*,  
248 encoding an F-box-containing E3 ligase directly mediating the proteasomal degradation of  
249 DELLAs (Lozano-Juste and Leon, 2011), which causes growth inhibition. However, while the  
250 inhibitory role of NO on plant growth has been noticed, the underpinning mechanisms remains  
251 largely unknown. The finding that *S*-nitrosylation of RGA, a major member of DELLA repressor  
252 proteins, inhibits its interaction with SLY1 and consequently prevent its proteasomal degradation,  
253 reveals a unique regulatory mechanism that confers plants a more rapid and efficient response  
254 when sensing adverse growth conditions. Moreover, we also find that *S*-nitrosylation of RGA at  
255 Cys-347 is essential for its regulatory role in salt stress responses. Together, the NO-mediated *S*-  
256 nitrosylation of RGA inhibits growth whereas enhances salt stress tolerance, representing a  
257 unique mechanism that balances the growth and survival of plants when challenged by  
258 detrimental growth conditions.

259 While an interplay between gibberellin and NO signaling coordinates plant growth and stress  
260 responses as revealed in this study, an analogous regulatory scheme has also been appreciated  
261 between the cytokinin and NO pathways. The *S*-nitrosylation of AHP1, a key regulator of

262 cytokinin responses, causes a reduction of its phosphorylation, thereby negatively regulating  
263 signaling of this growth-promotion phytohormone (Feng et al., 2013). Therefore, *S*-nitrosylation  
264 may represent an important mechanism that integrates an NO signal into signaling of growth-  
265 promotion phytohormones and eventually retards growth in response to environmental stresses. It  
266 has been noticed that the protein *S*-nitrosylation level is tightly regulated by the intracellular NO  
267 concentrations (Benhar et al., 2009; Feng et al., 2019; Hess et al., 2005; Hu et al., 2015), which is  
268 induced by various stimuli in fluctuating environments (Wang et al., 2010; Zhao et al., 2009;  
269 Zhou et al., 2016). Thus, *S*-nitrosylation of DELLA proteins permits a rapid response to diverse  
270 environmental alterations. When growth conditions become favorable, the intracellular NO level  
271 is returned to a physiologically normal level, which may trigger a reverse denitrosylation reaction  
272 (Benhar et al., 2009; Kneeshaw et al., 2014; Tada et al., 2008). It is reasonable to speculate that  
273 the denitrosylation of RGA resets the transcriptional repressor under the control of gibberellin-  
274 promoted proteasomal degradation, thereby relieving from the growth retardation. Therefore,  
275 RGA acts a signaling molecule to sense intracellular NO level to coordinate plant growth and  
276 stress tolerance in response to dynamically altered environment.

277 In addition to Cys-374, several other Cys residues, including Cys-249, Cys-506, and Cys-  
278 564, of RGA are also identified as the *S*-nitrosylated sites in mass spectrometric analysis. While  
279 *S*-nitrosylation of these Cys residues remains functionally unclear, it is well known that  
280 gibberellins regulate multiple biological processes, largely dependent on the interactions between  
281 DELLAs and transcription factors of other signaling pathways. For instance, GAI and RGA  
282 interact physically with PIF3 and PIF4, two bHLH transcription factors, to regulates the plant  
283 growth (de Lucas et al., 2008; Feng et al., 2008). As NO is involved in regulating diverse  
284 biological processes, it is of great interest to investigate whether *S*-nitrosylation at Cys-249, Cys-  
285 506, or Cys-564 affects interaction between RGA and its interacting proteins.

286 Finally, DELLA proteins are regulated by multiple forms of posttranslational modifications,  
287 including phosphorylation, SUMOylation, *O*-GlcNAcylation, and *O*-fucosylation (Conti et al.,  
288 2014; Dai and Xue, 2010; Zentella et al., 2016). Investigation of possible interactions of these

289 posttranslational modifications, including *S*-nitrosylation, will be of great interests toward the  
290 understanding how plants balance growth and stress tolerance in response to environmental  
291 alterations.  
292

## 293 **STAR★METHODS**

294 Detailed methods are provided in the online version of this paper and include the following:

- 295 • **KEY RESOURCES TABLE**
- 296 • **LEAD CONTACT AND MATERIALS AVAILABILITY**
- 297 • **EXPERIMENTAL MODEL AND SUBJECT DETAILS**
- 298 • **METHOD DETAILS**
  - 299 ○ Plasmid construction
  - 300 ○ Expression and purification of recombinant proteins
  - 301 ○ Generation of antibodies and immunoblotting
  - 302 ○ Bimolecular fluorescence complementation analyses
  - 303 ○ In vitro pull down
  - 304 ○ Co-immunoprecipitation
  - 305 ○ In vitro *S*-nitrosylation assay
  - 306 ○ In vivo *S*-nitrosylation assay
  - 307 ○ Mass spectrometric analysis of *S*-nitrosylation residues

308

- 309 • **QUANTIFICATION AND STATISTICAL ANALYSIS**

- 310 • **DATA AND CODE AVAILABILITY**

311

## 312 **SUPPLEMENTAL INFORMATION**

313 Supplemental information includes 5 figures and 2 tables and can be found with this article  
314 online.

315

## 316 **ACKNOWLEDGEMENTS**

317 We thank the *Arabidopsis* Biological Resource Center (ABRC) and Xiangdong Fu for seeds. This  
318 work was supported by grants from the National Natural Science Foundation of China (31830017  
319 and 31521001), Chinese Academy of Sciences (XDB27030207), and State Key Laboratory of

320 Plant Genomics (SKLPG2020-22).

321

## 322 AUTHOR CONTRIBUTIONS

323 L.C. performed the majority of the experiment, assisted by S.S. J.Z., L.C., J.-M.Z., and JL  
324 designed the experiments and analyzed the data. J.Z. wrote the manuscript, assisted by L.C. All  
325 authors discussed the results and commented on the manuscript.

326

## 327 DECLARATION OF INTEREST

328 The authors declare no competing interests.

329

## 330 Reference

331

- 332 Achard, P., Cheng, H., De Grauwe, L., Decat, J., Schoutteten, H., Moritz, T., Van Der Straeten, D., Peng, J., and  
333 Harberd, N.P. (2006). Integration of plant responses to environmentally activated phytohormonal signals. *Science*  
334 *311*, 91-94.
- 335 Achard, P., Gusti, A., Cheminant, S., Alioua, M., Dhondt, S., Coppens, F., Beemster, G.T., and Genschik, P. (2009).  
336 Gibberellin signaling controls cell proliferation rate in Arabidopsis. *Curr Biol* *19*, 1188-1193.
- 337 Achard, P., Liao, L., Jiang, C., Desnos, T., Bartlett, J., Fu, X., and Harberd, N.P. (2007). DELLAs contribute to plant  
338 photomorphogenesis. *Plant Physiol* *143*, 1163-1172.
- 339 Albertos, P., Romero-Puertas, M.C., Tatematsu, K., Mateos, I., Sanchez-Vicente, I., Nambara, E., and Lorenzo, O.  
340 (2015). S-nitrosylation triggers ABI5 degradation to promote seed germination and seedling growth. *Nat Commun* *6*,  
341 8669.
- 342 An, F., Zhang, X., Zhu, Z., Ji, Y., He, W., Jiang, Z., Li, M., and Guo, H. (2012). Coordinated regulation of apical  
343 hook development by gibberellins and ethylene in etiolated Arabidopsis seedlings. *Cell Res* *22*, 915-927.
- 344 Astier, J., Rasul, S., Koen, E., Manzoor, H., Besson-Bard, A., Lamotte, O., Jeandroz, S., Durner, J., Lindermayr, C.,  
345 and Wendehenne, D. (2011). S-nitrosylation: an emerging post-translational protein modification in plants. *Plant Sci*  
346 *181*, 527-533.
- 347 Bai, M.Y., Shang, J.X., Oh, E., Fan, M., Bai, Y., Zentella, R., Sun, T.P., and Wang, Z.Y. (2012). Brassinosteroid,  
348 gibberellin and phytochrome impinge on a common transcription module in Arabidopsis. *Nat Cell Biol* *14*, 810-817.
- 349 Bechtold, N., and Pelletier, G. (1998). In planta Agrobacterium-mediated transformation of adult Arabidopsis  
350 thaliana plants by vacuum infiltration. *Methods Mol Biol* *82*, 259-266.
- 351 Belda-Palazon, B., Adamo, M., Valerio, C., Ferreira, L.J., Confraria, A., Reis-Barata, D., Rodrigues, A., Meyer, C.,  
352 Rodriguez, P.L., and Baena-Gonzalez, E. (2020). A dual function of SnRK2 kinases in the regulation of SnRK1 and  
353 plant growth. *Nat Plants* *6*, 1345-1353.
- 354 Benhar, M., Forrester, M.T., and Stamler, J.S. (2009). Protein denitrosylation: enzymatic mechanisms and cellular

355 functions. *Nat Rev Mol Cell Biol* *10*, 721-732.

356 Chen, L., Wu, R., Feng, J., Feng, T., Wang, C., Hu, J., Zhan, N., Li, Y., Ma, X., Ren, B., *et al.* (2020).

357 Transnitrosylation Mediated by the Non-canonical Catalase ROG1 Regulates Nitric Oxide Signaling in Plants. *Dev*

358 *Cell* *53*, 444-457 e445.

359 Chen, R.Q., Sun, S.L., Wang, C., Li, Y.S., Liang, Y., An, F.Y., Li, C., Dong, H.L., Yang, X.H., Zhang, J., *et al.* (2009).

360 The Arabidopsis PARAQUAT RESISTANT2 gene encodes an S-nitrosoglutathione reductase that is a key regulator

361 of cell death. *Cell Research* *19*, 1377-1387.

362 Cheng, H., Qin, L., Lee, S., Fu, X., Richards, D.E., Cao, D., Luo, D., Harberd, N.P., and Peng, J. (2004). Gibberellin

363 regulates Arabidopsis floral development via suppression of DELLA protein function. *Development* *131*, 1055-1064.

364 Conti, L., Nelis, S., Zhang, C., Woodcock, A., Swarup, R., Galbiati, M., Tonelli, C., Napier, R., Hedden, P., Bennett,

365 M., *et al.* (2014). Small Ubiquitin-like Modifier protein SUMO enables plants to control growth independently of the

366 phytohormone gibberellin. *Dev Cell* *28*, 102-110.

367 Dai, C., and Xue, H.W. (2010). Rice early flowering1, a CKI, phosphorylates DELLA protein SLR1 to negatively

368 regulate gibberellin signalling. *EMBO J* *29*, 1916-1927.

369 Daviere, J.M., and Achard, P. (2013). Gibberellin signaling in plants. *Development* *140*, 1147-1151.

370 de Lucas, M., Daviere, J.M., Rodriguez-Falcon, M., Pontin, M., Iglesias-Pedraz, J.M., Lorrain, S., Fankhauser, C.,

371 Blazquez, M.A., Titarenko, E., and Prat, S. (2008). A molecular framework for light and gibberellin control of cell

372 elongation. *Nature* *451*, 480-484.

373 Debeaujon, I., and Koornneef, M. (2000). Gibberellin requirement for Arabidopsis seed germination is determined

374 both by testa characteristics and embryonic abscisic acid. *Plant Physiology* *122*, 415-424.

375 Dill, A., Thomas, S.G., Hu, J., Steber, C.M., and Sun, T.P. (2004). The Arabidopsis F-box protein SLEEPY1 targets

376 gibberellin signaling repressors for gibberellin-induced degradation. *Plant Cell* *16*, 1392-1405.

377 Duan, Q., Liu, M.J., Kita, D., Jordan, S.S., Yeh, F.J., Yvon, R., Carpenter, H., Federico, A.N., Garcia-Valencia, L.E.,

378 Eyles, S.J., *et al.* (2020). FERONIA controls pectin- and nitric oxide-mediated male-female interaction. *Nature* *579*,

379 561-566.

380 Feechan, A., Kwon, E., Yun, B.W., Wang, Y., Pallas, J.A., and Loake, G.J. (2005). A central role for S-nitrosothiols in

381 plant disease resistance. *Proc Natl Acad Sci U S A* *102*, 8054-8059.

382 Feng, J., Chen, L., and Zuo, J. (2019). Protein S-Nitrosylation in plants: Current progresses and challenges. *J Integr*

383 *Plant Biol* *61*, 1206-1223.

384 Feng, J., Wang, C., Chen, Q., Chen, H., Ren, B., Li, X., and Zuo, J. (2013). S-nitrosylation of phosphotransfer

385 proteins represses cytokinin signaling. *Nature Communications* *4*, 1529.

386 Feng, S., Martinez, C., Gusmaroli, G., Wang, Y., Zhou, J., Wang, F., Chen, L., Yu, L., Iglesias-Pedraz, J.M., Kircher,

387 S., *et al.* (2008). Coordinated regulation of Arabidopsis thaliana development by light and gibberellins. *Nature* *451*,

388 475-479.

389 Fernandez-Marcos, M., Sanz, L., Lewis, D.R., Muday, G.K., and Lorenzo, O. (2011). Nitric oxide causes root apical

390 meristem defects and growth inhibition while reducing PIN-FORMED 1 (PIN1)-dependent acropetal auxin transport.

391 *Proc Natl Acad Sci U S A* *108*, 18506-18511.

392 He, Y., Tang, R.H., Hao, Y., Stevens, R.D., Cook, C.W., Ahn, S.M., Jing, L., Yang, Z., Chen, L., Guo, F., *et al.*

393 (2004). Nitric oxide represses the Arabidopsis floral transition. *Science* *305*, 1968-1971.

394 Hess, D.T., Matsumoto, A., Kim, S.O., Marshall, H.E., and Stamler, J.S. (2005). Protein S-nitrosylation: purview and

395 parameters. *Nat Rev Mol Cell Biol* *6*, 150-166.



396 Hou, X., Lee, L.Y., Xia, K., Yan, Y., and Yu, H. (2010). DELLAs modulate jasmonate signaling via competitive  
397 binding to JAZs. *Dev Cell* *19*, 884-894.

398 Hu, J., Huang, X., Chen, L., Sun, X., Lu, C., Zhang, L., Wang, Y., and Zuo, J. (2015). Site-specific nitrosoproteomic  
399 identification of endogenously S-nitrosylated proteins in Arabidopsis. *Plant Physiol* *167*, 1731-1746.

400 Hu, J., Yang, H., Mu, J., Lu, T., Peng, J., Deng, X., Kong, Z., Bao, S., Cao, X., and Zuo, J. (2017). Nitric Oxide  
401 Regulates Protein Methylation during Stress Responses in Plants. *Mol Cell* *67*, 702-710 e704.

402 Huang, J., Tang, D., Shen, Y., Qin, B., Hong, L., You, A., Li, M., Wang, X., Yu, H., Gu, M., *et al.* (2010). Activation  
403 of gibberellin 2-oxidase 6 decreases active gibberellin levels and creates a dominant semi-dwarf phenotype in rice  
404 (*Oryza sativa* L.). *J Genet Genomics* *37*, 23-36.

405 King, K.E., Moritz, T., and Harberd, N.P. (2001). Gibberellins are not required for normal stem growth in  
406 Arabidopsis thaliana in the absence of GAI and RGA. *Genetics* *159*, 767-776.

407 Kneeshaw, S., Gelineau, S., Tada, Y., Loake, G.J., and Spoel, S.H. (2014). Selective protein denitrosylation activity  
408 of Thioredoxin-h5 modulates plant Immunity. *Mol Cell* *56*, 153-162.

409 Kwon, E., Feechan, A., Yun, B.W., Hwang, B.H., Pallas, J.A., Kang, J.G., and Loake, G.J. (2012). AtGSNOR1  
410 function is required for multiple developmental programs in Arabidopsis. *Planta* *236*, 887-900.

411 Lee, U., Wie, C., Fernandez, B.O., Feelisch, M., and Vierling, E. (2008). Modulation of nitrosative stress by S-  
412 nitrosoglutathione reductase is critical for thermotolerance and plant growth in Arabidopsis. *Plant Cell* *20*, 786-802.

413 Liu, L., Hausladen, A., Zeng, M., Que, L., Heitman, J., and Stamler, J.S. (2001). A metabolic enzyme for S-  
414 nitrosothiol conserved from bacteria to humans. *Nature* *410*, 490-494.

415 Liu, W.Z., Kong, D.D., Gu, X.X., Gao, H.B., Wang, J.Z., Xia, M., Gao, Q., Tian, L.L., Xu, Z.H., Bao, F., *et al.*  
416 (2013). Cytokinins can act as suppressors of nitric oxide in Arabidopsis. *Proc Natl Acad Sci U S A* *110*, 1548-1553.

417 Lozano-Juste, J., and Leon, J. (2011). Nitric oxide regulates DELLA content and PIF expression to promote  
418 photomorphogenesis in Arabidopsis. *Plant Physiol* *156*, 1410-1423.

419 Ren, B., Chen, Q., Hong, S., Zhao, W., Feng, J., Feng, H., and Zuo, J. (2013). The *Arabidopsis* eukaryotic translation  
420 initiation factor eIF5A-2 regulates root protoxylem development by modulating cytokinin signaling. *Plant Cell* *25*,  
421 3841-3857.

422 Schwechheimer, C., and Willige, B.C. (2009). Shedding light on gibberellic acid signalling. *Curr Opin Plant Biol* *12*,  
423 57-62.

424 Shu, K., Wu, Y., Yang, W., and Xie, Q. (2014). Concurrent deficiency of gibberellins and abscisic acid causes plant  
425 male sterility. *J Genet Genomics* *41*, 601-604.

426 Silverstone, A.L., Jung, H.S., Dill, A., Kawaide, H., Kamiya, Y., and Sun, T.P. (2001). Repressing a repressor:  
427 gibberellin-induced rapid reduction of the RGA protein in Arabidopsis. *Plant Cell* *13*, 1555-1566.

428 Smakowska, E., Kong, J., Busch, W., and Belkhadir, Y. (2016). Organ-specific regulation of growth-defense  
429 tradeoffs by plants. *Curr Opin Plant Biol* *29*, 129-137.

430 Stamler, J.S., Simon, D.I., Osborne, J.A., Mullins, M.E., Jaraki, O., Michel, T., Singel, D.J., and Loscalzo, J. (1992).  
431 S-nitrosylation of proteins with nitric oxide: synthesis and characterization of biologically active compounds. *Proc*  
432 *Natl Acad Sci U S A* *89*, 444-448.

433 Sun, T.P. (2011). The molecular mechanism and evolution of the GA-GID1-DELLA signaling module in plants. *Curr*  
434 *Biol* *21*, R338-345.

435 Tada, Y., Spoel, S.H., Pajeroska-Mukhtar, K., Mou, Z., Song, J., Wang, C., Zuo, J., and Dong, X. (2008). Plant  
436 immunity requires conformational changes of NPR1 via S-nitrosylation and thioredoxins. *Science* *321*, 952-956.

437 Terrile, M.C., Paris, R., Calderon-Villalobos, L.I., Iglesias, M.J., Lamattina, L., Estelle, M., and Casalongue, C.A.  
438 (2012). Nitric oxide influences auxin signaling through S-nitrosylation of the Arabidopsis TRANSPORT  
439 INHIBITOR RESPONSE 1 auxin receptor. *Plant Journal* *70*, 492-500.

440 Ubeda-Tomas, S., Federici, F., Casimiro, I., Beemster, G.T., Bhalerao, R., Swarup, R., Doerner, P., Haseloff, J., and  
441 Bennett, M.J. (2009). Gibberellin signaling in the endodermis controls Arabidopsis root meristem size. *Curr Biol* *19*,  
442 1194-1199.

443 Ubeda-Tomas, S., Swarup, R., Coates, J., Swarup, K., Laplaze, L., Beemster, G.T.S., Hedden, P., Bhalerao, R., and  
444 Bennett, M.J. (2008). Root growth in Arabidopsis requires gibberellin/DELLA signalling in the endodermis. *Nat Cell*  
445 *Biol* *10*, 625-628.

446 Verma, V., Ravindran, P., and Kumar, P.P. (2016). Plant hormone-mediated regulation of stress responses. *BMC Plant*  
447 *Biol* *16*, 86.

448 Wang, F., Chen, X., Dong, S., Jiang, X., Wang, L., Yu, J., and Zhou, Y. (2020a). Crosstalk of PIF4 and DELLA  
449 modulates CBF transcript and hormone homeostasis in cold response in tomato. *Plant Biotechnol J* *18*, 1041-1055.

450 Wang, P., Du, Y., Hou, Y.J., Zhao, Y., Hsu, C.C., Yuan, F., Zhu, X., Tao, W.A., Song, C.P., and Zhu, J.K. (2015).  
451 Nitric oxide negatively regulates abscisic acid signaling in guard cells by S-nitrosylation of OST1. *Proc Natl Acad*  
452 *Sci U S A* *112*, 613-618.

453 Wang, P., Du, Y., Li, Y., Ren, D., and Song, C.P. (2010). Hydrogen peroxide-mediated activation of MAP kinase 6  
454 modulates nitric oxide biosynthesis and signal transduction in Arabidopsis. *Plant Cell* *22*, 2981-2998.

455 Wang, Z., Liu, L., Cheng, C., Ren, Z., Xu, S., and Li, X. (2020b). GAI Functions in the Plant Response to  
456 Dehydration Stress in Arabidopsis thaliana. *Int J Mol Sci* *21*.

457 Wilson, R.N., Heckman, J.W., and Somerville, C.R. (1992). Gibberellin Is Required for Flowering in Arabidopsis-  
458 Thaliana under Short Days. *Plant Physiology* *100*, 403-408.

459 Xu, H., Liu, Q., Yao, T., and Fu, X. (2014). Shedding light on integrative GA signaling. *Curr Opin Plant Biol* *21*, 89-  
460 95.

461 Yang, D.L., Yao, J., Mei, C.S., Tong, X.H., Zeng, L.J., Li, Q., Xiao, L.T., Sun, T.P., Li, J., Deng, X.W., *et al.* (2012).  
462 Plant hormone jasmonate prioritizes defense over growth by interfering with gibberellin signaling cascade. *Proc Natl*  
463 *Acad Sci U S A* *109*, E1192-1200.

464 Yang, H., Mu, J., Chen, L., Feng, J., Hu, J., Li, L., Zhou, J.M., and Zuo, J. (2015). S-nitrosylation positively  
465 regulates ascorbate peroxidase activity during plant stress responses. *Plant Physiol* *167*, 1604-1615.

466 Yu, M., Lamattina, L., Spoel, S.H., and Loake, G.J. (2014). Nitric oxide function in plant biology: a redox cue in  
467 deconvolution. *New Phytol* *202*, 1142-1156.

468 Zentella, R., Hu, J., Hsieh, W.P., Matsumoto, P.A., Dawdy, A., Barnhill, B., Oldenhof, H., Hartweck, L.M., Maitra,  
469 S., Thomas, S.G., *et al.* (2016). O-GlcNAcylation of master growth repressor DELLA by SECRET AGENT  
470 modulates multiple signaling pathways in Arabidopsis. *Genes Dev* *30*, 164-176.

471 Zhao, M.G., Liu, R.J., Chen, L., Tian, Q.Y., and Zhang, W.H. (2009). Glucose-induced inhibition of seed germination  
472 in *Lotus japonicus* is alleviated by nitric oxide and spermine. *J Plant Physiol* *166*, 213-218.

473 Zhou, J.M., and Zhang, Y. (2020). Plant Immunity: Danger Perception and Signaling. *Cell* *181*, 978-989.

474 Zhou, S., Jia, L., Chu, H., Wu, D., Peng, X., Liu, X., Zhang, J., Zhao, J., Chen, K., and Zhao, L. (2016). Arabidopsis  
475 CaM1 and CaM4 Promote Nitric Oxide Production and Salt Resistance by Inhibiting S-Nitrosoglutathione Reductase  
476 via Direct Binding. *PLoS Genet* *12*, e1006255.

477 Zhu, J.K. (2016). Abiotic Stress Signaling and Responses in Plants. *Cell* *167*, 313-324.

478 Zuo, J.R., Niu, Q.W., and Chua, N.H. (2000). An estrogen receptor-based transactivator XVE mediates highly  
479 inducible gene expression in transgenic plants. *Plant Journal* 24, 265-273.

480

481

482 **FIGURE LEGENDS**

483

484 **Figure 1. Nitric oxide antagonizes gibberellin-promoted root and hypocotyl elongation, see**  
485 **also Supplemental Figure S1 and S2**

486 (A and B) Hypocotyl length (A) and primary root length (B) of 7-day-old Col-0 seedlings treated  
487 with the indicated concentrations of gibberellic acid (GA<sub>3</sub>) and sodium nitroprusside (SNP).

488 (C and D) Hypocotyl length (C) and primary root length (D) of 7-day-old Col-0 and *gsnor1-3*  
489 seedlings treated with 5 μM GA<sub>3</sub>.

490 (E) Hypocotyl length of 7-day-old Col-0 and *rga* seedlings treated with 20 μM SNP.

491 (F and G) Hypocotyl length (F) and primary root length (G) of 7-day-old Col-0, *gai-t6 rga-24*  
492 and *della (gai-t6 rga-t2 rgl1-1 rgl2-1)* seedlings treated with 20 μM SNP.

493 In each experiment, 30 seedlings were analyzed. \*, \*\*, and \*\*\* indicate  $P < 0.05$ ,  $P < 0.01$ , and  $P$   
494  $< 0.001$  (one-way ANOVA test), respectively.

495

496 **Figure 2. Nitric oxide inhibits gibberellin-promoted RGA degradation, see also**  
497 **Supplemental Figure S3, S4 and Table S1**

498 (A and B) Immunoblotting analysis of GFP-RGA proteins in 7-day-old *pRGA::GFP-RGA*  
499 transgenic seedlings treated with indicated concentrations of GSNO for 6 hours (A) and 300 μM  
500 GSNO for the indicated times (B) by using an anti-GFP antibody. Immunoblotting with an anti-  
501 tubulin antibody is served as a loading control. Quantification of GFP-RGA is shown below the  
502 blot.

503 (C) Immunoblotting analysis of RGA proteins in 7-day-old Col-0, *gsnor1-3*, and *nox1* seedlings  
504 by using an anti-RGA antibody. Quantification of RGA is shown below the blot.

505 (D) Immunoblotting analysis of GFP-RGA proteins in 7-day-old *pRGA::GFP-RGA* transgenic  
506 seedlings treated with or without 300 μM GSNO and 0.5 μM GA<sub>3</sub> for 6 hours using an anti-GFP  
507 antibody. Quantification of GFP-RGA is shown below the blot.

508 (E) Analysis of the interaction of SLY1 and RGA1 recombinant proteins with a pull-down assay.

509 GST<sup>4CS</sup>-RGA protein was treated with the indicated concentrations of GSNO or GSH prior to the  
510 incubation with His-SLY1. Quantification of the His-SLY1 level is shown below the blot.  
511 (F) Bimolecular fluorescence complementation (BiFC) analysis of co-localization of YNE-RGA1  
512 and YCE-SLY1 fusion proteins in transiently expressed in tobacco leaves sprayed with 300  $\mu$ M  
513 GSNO. Bar, 20  $\mu$ m.

514  
515 **Figure 3. S-nitrosylation at Cys-374 modulates RGA stability, see also Supplemental Figure**  
516 **S5, Table S1 and Table S2**

517 (A) Analysis of *S*-nitrosylated GST<sup>4CS</sup>-RGA recombinant protein treated with GSNO by an in  
518 vitro *S*-nitrosylation assay. Treatment with GSH and without sodium ascorbate (Asc) are served  
519 as negative controls.

520 (B) Analysis of *S*-nitrosylated GFP-RGA protein in *pRGA::GFP-RGA* transgenic seedlings by an  
521 in vivo *S*-nitrosylation assay. The sample without Asc treatment is served as a negative control.

522 (C) Liquid chromatography tandem-mass (LC-MS/MS) spectrum of trypsin-digested and biotin-  
523 charged RGA peptides. The b- and y-type product ions are indicated, which identified Cys-374 as  
524 an *S*-nitrosylated residue.

525 (D) Analysis of *S*-nitrosylated GST<sup>4CS</sup>-RGA (RGA) and GST<sup>4CS</sup>-RGA<sup>C374S</sup> (C374S) recombinant  
526 proteins treated with GSNO by an in vitro *S*-nitrosylation assay. Treatment with GSH is served as  
527 negative controls. Quantification of the *S*-nitrosylation level of GST<sup>4CS</sup>-RGA and GST<sup>4CS</sup>-  
528 RGA<sup>C374S</sup> is shown below the blot.

529 (E) Analysis of *S*-nitrosylated GFP-RGA and RGA<sup>C374S</sup> (C374S) proteins in planta by an in vivo  
530 *S*-nitrosylation assay. The sample without Asc treatment is served as a negative control.

531 Quantification of the *S*-nitrosylation level of RGA and RGA<sup>C374S</sup> is shown below the blot.

532 (F) Analysis of the interaction of RGA, RGA<sup>C374S</sup> and SLY1 recombinant proteins with a pull-  
533 down assay. GST<sup>4CS</sup>-RGA and GST<sup>4CS</sup>-RGA<sup>C374S</sup> was treated with 300  $\mu$ M GSNO to generate *S*-  
534 nitrosylated proteins prior to the incubation with His-SLY1.

535 (G) Analysis of the interaction of HA-SLY1, FLAG-RGA and FLAG-RGA<sup>C374S</sup> (FLAG-C374S)  
536 proteins by a co-immunoprecipitation assay. The *HA-SLY1* and *FLAG-RGA* fusion genes under

537 the control of the 35S promoter were transiently expressed in tobacco leaves that were incubated  
538 with or without 300  $\mu$ M SNP for 1 hour. Protein extracts were used for Co-IP and analyzed by  
539 immunoblotting using anti-HA and -FLAG antibodies. Quantification of HA-SLY1 is shown  
540 below the blot. And protein level of HA-SLY1 that interacts with FLAG-RGA and FLAG-C374S  
541 without SNP treatment is set as 1.0, respectively.

542 (H) Immunoblotting analysis of GFP-RGA proteins in *gai-t6 rga-24* transgenic seedlings of the  
543 indicated genotypes treated with 300  $\mu$ M SNP for 6 hours using an anti-RGA antibody.

544 Quantification of the GFP-RGA and GFP-RGA<sup>C374S</sup> protein levels is shown below the blot.

545 Protein levels of GFP-RGA and GFP-RGA<sup>C374S</sup> without treatment are set as 1.0, respectively.

546 (I) Immunoblotting analysis of GFP-RGA and GFP-RGA<sup>C374S</sup> proteins in 7-day-old *pRGA::GFP-*

547 *RGA*, *pRGA::GFP-RGA<sup>C374S</sup>* transgenic seedlings treated with or without 300  $\mu$ M GSNO and 0.5

548  $\mu$ M GA<sub>3</sub> for 6 hours by using an anti-RGA antibody. Quantification of the GFP-RGA and GFP-

549 RGA<sup>C374S</sup> protein levels is shown below the blot. Protein levels of GFP-RGA and GFP-

550 RGAC374S without treatment are set as 1.0, respectively.

551 (J) Immunoblotting analysis of GFP-RGA and GFP-RGA<sup>C374S</sup> proteins in 7-day-old *pRGA::GFP-*

552 *RGA*, *pRGA::GFP-RGA<sup>C374S</sup>* transgenic seedlings treated with or without 300  $\mu$ M SNP, and 0.5

553  $\mu$ M GA<sub>3</sub> for 6 hours by using an anti-RGA antibody. Quantification of the GFP-RGA and GFP-

554 RGA<sup>C374S</sup> protein levels is shown below the blot. Protein levels of GFP-RGA and GFP-RGA<sup>C374S</sup>

555 without treatment are set as 1.0, respectively.

556 Data presented in (H)-(J) are means of three independent experiments with S.D. \* and \*\* indicate

557  $P < 0.05$  and  $P < 0.01$ , respectively (One-way ANOVA test).

558

559 **Figure 4. S-nitrosylation of RGA balances plant growth and salinity tolerance, see also**

560 **Figure S1 and Supplemental Table S1**

561 (A) Ten-day-old seedlings of the indicated genotypes treated with 50  $\mu$ M SNP or 5  $\mu$ M GA<sub>3</sub>. Bar,

562 1 cm.

563 (B) and (C) Analysis of hypocotyl length (B) and primary root length (C) of transgenic seedlings

564 of the indicated genotypes treated with 50  $\mu$ M SNP or 5  $\mu$ M GA<sub>3</sub> for 10 days.  
565 (D) Five-day-old seedlings of the indicated genotypes on 1/2MS medium were transferred to the  
566 medium containing 125 mM NaCl. Photos were taken 2 weeks post the transfer. Bar, 1 cm.  
567 (E) Analysis of the survival rate of transgenic seedlings of the indicated genotypes shown in (D).  
568 (F) Immunoblotting analysis of GFP-RGA proteins in *gai-16 rga-24* transgenic seedlings of the  
569 indicated genotypes treated with 150 mM NaCl for 6 hours using an anti-RGA antibody.  
570 Quantification of the GFP-RGA and GFP-RGA<sup>C374S</sup> protein levels is shown below the blot.  
571 (G) A proposed model illustrating the function of *S*-nitrosylation of RGA. Under normal growth  
572 conditions, SLY1 interacts with RGA, which leads to the polyubiquitination and degradation of  
573 RGA via the 26S proteasome pathway. High salt induces the NO burst, which subsequently  
574 induces the *S*-nitrosylation of RGA. The *S*-nitrosylation inhibits the RGA-SLY1 interaction and  
575 enhances the stability of RGA. Accumulating RGA inhibits plant growth and enhance the salinity  
576 tolerance.  
577  $\geq 30$  seedlings are analyzed for each sample in (B) and (C). Data presented in (E) and (F) are  
578 means of three independent experiments with S.D. \* and \*\* indicate  $P < 0.05$  and  $P < 0.01$ ,  
579 respectively (One-way ANOVA test).  
580

581 **STAR★METHODS**

582

583 **KEY RESOURCES TABLE**

584

| REAGENT or RESOURCE                                                  | SOURCE                    | IDENTIFIER    |
|----------------------------------------------------------------------|---------------------------|---------------|
| <b>Antibodies</b>                                                    |                           |               |
| HRP-linked anti-biotin                                               | Cell Signaling Technology | Cat#7075      |
| Mouse monoclonal anti-GFP                                            | Abmart                    | Cat# M20004L  |
| Mouse monoclonal anti-GST                                            | Abgent                    | Cat # AM1011a |
| Mouse monoclonal anti-His                                            | CMCTAG                    | Cat # AT0025  |
| Mouse monoclonal anti-tubulin                                        | Sigma-Aldrich             | Cat# T5168    |
| Rabbit polyclonal anti-HA                                            | Abgent                    | Cat# AP1012a  |
| Mouse monoclonal anti-FLAG <sup>®</sup> M2-peroxidase (HRP) antibody | Sigma-Aldrich             | Cat# A8592    |
| Mouse polyclonal anti-RGA                                            | This paper                | N/A           |
| <b>Bacterial and Virus Strains</b>                                   |                           |               |
| <i>E. coli</i> DH5                                                   | TransGen Biotech          | Cat# CD201    |
| <i>E. coli</i> BL21                                                  | TransGen Biotech          | Cat# CD901    |
| <i>Agrobacterium tumefaciens</i> GV3101                              | Biomed                    | Cat# BC304    |
| <b>Chemicals, Peptides, and Recombinant Proteins</b>                 |                           |               |
| His-SLY1                                                             | This paper                | N/A           |
| His-GID1a                                                            | This paper                | N/A           |
| His-GID1c                                                            | This paper                | N/A           |
| His-RGA Nter                                                         | This paper                | N/A           |
| GST <sup>4CS</sup>                                                   | (Feng et al., 2013)       | N/A           |
| GST <sup>4CS</sup> -RGA                                              | This paper                | N/A           |
| GST <sup>4CS</sup> -RGA <sup>C374S</sup>                             | This paper                | N/A           |
| GST <sup>4CS</sup> -GAI                                              | This paper                | N/A           |
| GST <sup>4CS</sup> -RGL1                                             | This paper                | N/A           |
| GST <sup>4CS</sup> -RGL2                                             | This paper                | N/A           |
| GST <sup>4CS</sup> -RGL3                                             | This paper                | N/A           |
| S-nitrosoglutathione (GSNO)                                          | Sigma-Aldrich             | Cat# N4148    |
| Sodium nitroprusside (SNP)                                           | Sigma-Aldrich             | Cat# 71778    |
| Biotin-HPDP                                                          | Thermo Scientific         | Cat# 21341    |
| Biotin-maleimide                                                     | Sigma-Aldrich             | Cat# B1267    |
| Glutathione                                                          | Sigma-Aldrich             | Cat# G4251    |
| Methyl methanethiosulfonate (MMTS)                                   | Thermo Scientific         | Cat# 23011    |
| Neocuproine                                                          | Sigma-Aldrich             | Cat# N1501    |



|                                                    |                            |                 |
|----------------------------------------------------|----------------------------|-----------------|
| Sodium ascorbate                                   | Sigma-Aldrich              | Cat# A7631      |
| Gibberellic acid (GA <sub>3</sub> )                | TCI                        | Cat# G0029      |
| Paclitaxel                                         | Sigma-Aldrich              | Cat# 46046      |
| Protease Inhibitor Cocktail                        | Sigma-Aldrich              | Cat# P9599      |
| Trypsin                                            | Promega                    | Cat# V5280      |
| Critical Commercial Assays                         |                            |                 |
| Ni-NTA resin                                       | QIAGEN                     | Cat# 30210      |
| Glutathione Sepharose                              | GE                         | Cat# 17-0756-01 |
| High Capacity Neutravidin Agarose Resin            | Thermo Scientific          | Cat# 29202      |
| Anti-FLAG <sup>®</sup> M2 Affinity Gel             | Sigma-Aldrich              | Cat# A2220      |
| Zeba Spin Desalting Columns                        | Thermo Scientific          | Cat# 89883      |
| Experimental Models: Organisms/Strains             |                            |                 |
| <i>Arabidopsis: gsnor1-3</i>                       | (Feechan et al., 2005)     | GABI_315D11     |
| <i>Arabidopsis: nox1</i>                           | (He et al., 2004)          | N/A             |
| <i>Arabidopsis: rga</i>                            | This paper                 | SALK_089146     |
| <i>Arabidopsis: gai-t6 rga-24</i>                  | (King et al., 2001)        | N/A             |
| <i>Arabidopsis: gai-t6 rga-t2 rgl1-1 rgl2-1</i>    | (Achard et al., 2006)      | N/A             |
| <i>Arabidopsis: pRGA:: GFP-RGA</i>                 | (Silverstone et al., 2001) | N/A             |
| <i>Arabidopsis: pRGA:: GFP-RGA (pER8)</i>          | This paper                 | N/A             |
| <i>Arabidopsis: pRGA:: GFP-RGA<sup>C374S</sup></i> | This paper                 | N/A             |
| Oligonucleotides                                   |                            |                 |
| Primers for cloning, PCR and genotyping            | This paper (see Table S1)  | N/A             |
| Recombinant DNA                                    |                            |                 |
| pET28a-SLY1                                        | This paper                 | N/A             |
| pET28a-GID1a                                       | This paper                 | N/A             |
| pET28a-GID1c                                       | This paper                 | N/A             |
| pET28a-RGA Nter                                    | This paper                 | N/A             |
| pGST <sup>4CS</sup>                                | (Feng et al., 2013)        | N/A             |
| pGST <sup>4CS</sup> -RGA                           | This paper                 | N/A             |
| pGST <sup>4CS</sup> -RGA <sup>C374S</sup>          | This paper                 | N/A             |
| pGST <sup>4CS</sup> -GAI                           | This paper                 | N/A             |
| pGST <sup>4CS</sup> -RGL1                          | This paper                 | N/A             |
| pGST <sup>4CS</sup> -RGL2                          | This paper                 | N/A             |
| pGST <sup>4CS</sup> -RGL3                          | This paper                 | N/A             |
| pWM101-FLAG-RGA                                    | This paper                 | N/A             |
| pWM101-FLAG-RGA <sup>C374S</sup>                   | This paper                 | N/A             |
| pWM101-HA-SLY1                                     | This paper                 | N/A             |
| pER8-pRGA:: GFP-RGA                                | This paper                 | N/A             |
| pER8-pRGA:: GFP-RGA <sup>C374S</sup>               | This paper                 | N/A             |

|                         |     |                                                                   |
|-------------------------|-----|-------------------------------------------------------------------|
| Software and Algorithms |     |                                                                   |
| ImageJ                  | NIH | <a href="http://imagej.nih.gov/ij/">http://imagej.nih.gov/ij/</a> |

585

## 586 LEAD CONTACT AND MATERIALS AVAILABILITY

587 Further information and requests for resources and reagents should be directed to and will be  
588 fulfilled by the Lead Contact, Jianru Zuo (jrzuo@genetics.ac.cn)

589

## 590 EXPERIMENTAL MODEL AND SUBJECT DETAILS

591 Columbia-0 (Col-0) and Landsberg *erecta* (*Ler*) accessions of *Arabidopsis* was used in this study.  
592 The *gsnor1-3* mutant seeds (Feechan et al., 2005) were provided by Gary Loake. The *nox1*  
593 mutant seeds (He et al., 2004) were provided by Yikun He. The *gai-t6 rga-24*, *gai-t6 rga-t2 rgl1-*  
594 *1 rgl2-1*, and *pRGA::GFP-RGA* transgenic line (*Ler* background) (Achard et al., 2006; King et  
595 al., 2001; Silverstone et al., 2001) were provided by Xiangdong Fu. The *rga* (SALK\_089146)  
596 mutant was obtained from ABRC. Generation of transgenic *Arabidopsis* plants was carried out by  
597 *Agrobacterium*-mediated transformation (Bechtold and Pelletier, 1998). The *pRGA::GFP-RGA*  
598 and *pRGA::GFP-RGA<sup>C374S</sup>* were introduced into *gai-t6 rga-24* plants. T2 or subsequent generations  
599 of transgenics that are homozygous for a single insertion were used for all studies. At least two  
600 independent transgenic lines are analyzed. Unless specified otherwise, no apparent phenotype  
601 was observed in these transgenic plants under normal growth conditions.

602 Seeds were sterilized and sown on 1/2 MS medium agar plates with 1% sucrose. The seeds  
603 were imbibed at 4°C for 2 days, and then cultured at 22°C under 16/8 h light/dark.

604

## 605 METHODS DETAILS

### 606 Plasmid construction

607 The coding sequence of *RGA* was inserted into the *Bam*HI/*Sa*II sites of pGST<sup>4CS</sup>, a modified  
608 pGEX4T1 vector, to generate pGST<sup>4CS</sup>-*RGA*. The pGST<sup>4CS</sup>-*GAI*, pGST<sup>4CS</sup>-*RGL1*, pGST<sup>4CS</sup>-  
609 *RGL2*, and pGST<sup>4CS</sup>-*RGL3* constructed were generated in a similar way. The coding sequences  
610 of *SLY1* and *GID1a* were inserted into the *Bam*HI/*Hind*III sites and *Bam*HI/*Sa*II sites,

611 respectively, to produce pET28a-SLY1 and pET28a-GID1a. The pET28a-GID1c and pET28a-  
612 RGA Nter vectors were generated in a similar way.

613 Putative promoter sequences and the coding regions of *RGA* were separately amplified and  
614 appropriate restriction sites were introduced during PCR. The promoter fragment was digested  
615 with *XhoI/NcoI*, and cloned into pSK-GFP with the same sites to generate pSK-pRGA::GFP.  
616 Fragments of *pRGA::GFP* and *RGA* coding regions were digested with *XhoI/PstI* and *PstI/SpeI*,  
617 respectively, and then cloned into the *XhoI/SpeI* sites of a pER8 binary vector (Zuo et al., 2000)  
618 to generate pER8- pRGA::GFP-RGA.

619 The coding sequences of *RGA* and *SLY1* were PCR-amplified and in-frame fused to an  
620 FLAG or HA tag to yield pSK-FLAG-RGA and pSK-HA-SLY1, respectively. *FLAG-RGA* and  
621 *HA-SLY1* were PCR-amplified and ligated to pMW101 at *KpnI/SalI* and *KpnI/PstI* under the  
622 control of a 35S promoter, respectively, to generate pWM101-FLAG-RGA and pWM101-HA-  
623 SLY1.

624 The BiFC expression vectors pCAMBIA1300-YNE-RGA and pCAMBIA1300-YCE-SLY1  
625 were constructed by a approach described previously (Chen et al., 2020).

626 Site-directed mutagenesis was performed using the Easy Mutagenesis System (TransGen  
627 Biotech, Beijing) according the manufacturer's instructions. Primers used for the mutagenesis are  
628 listed in Table S1.

629 All constructs were verified by extensive restriction digestion and DNA sequencing analysis.  
630 All PCR-related primers used in this study are listed in Table S1.

### 631 **Expression and purification of recombinant proteins**

632 The pET28a-SLY1, pET28a-GID1a, pET28a-GID1c, pET28a-RGA Nter, pGST<sup>4CS</sup>-RGA,  
633 pGST<sup>4CS</sup>-RGA<sup>C374S</sup>, pGST<sup>4CS</sup>-GAI, pGST<sup>4CS</sup>-RGL1, pGST<sup>4CS</sup>-RGL2, and pGST<sup>4CS</sup>-RGL3  
634 expression vectors were transformed into *Escherichia coli* strain BL21 (DE3). Expression and  
635 purification of the recombinant proteins were carried out following the manufacturer's  
636 instructions.

### 637 **Generation of antibodies and immunoblotting**

638 Anti-tubulin (Sigma-Aldrich, Cat #T5168), anti-GST (Abgent, Cat #AM1011a), anti-His  
639 (CMCTAG, Cat #AT0025), anti-GFP (Abmart, Cat#M20004L), anti-HA (Abgent, Cat #AP1012a)  
640 and anti-FLAG (Sigma-Aldrich, Cat #A8592) antibodies were obtained from commercial  
641 sources. RGA-specific antibodies were generated by immunizing mice with *Escherichia coli*-  
642 expressed N-terminal of RGA (His-RGA Nter). Total protein was extracted and no cross-reaction  
643 was observed in the *rga* mutant compared with Col-0 (Supplemental Figure 2C). Immunoblotting  
644 was carried out as previously described (Chen et al., 2009). Quantification of the immunoblot  
645 was performed using NIH ImageJ (version 1.44p; <http://imagej.nih.gov/ij/>).

#### 646 **Bimolecular fluorescence complementation analysis**

647 Bimolecular fluorescence complementation (BiFC) assays were performed as described (Chen et  
648 al., 2020). The *Nicotiana benthamiana* leaves were injected with agrobacteria cultures containing  
649 expression vectors and cultured for additional two days. 300  $\mu$ M GSNO was sprayed on the  
650 surface of the tobacco leaves for 2 hours. The leaves were then excised and observed under a  
651 confocal microscope.

#### 652 **In vitro pull down**

653 GST<sup>4CS</sup>-tagged RGA or RGA<sup>C374S</sup> recombinant proteins were incubated with indicated  
654 concentrations of GSH or GSNO in HEN buffer (250mM Hepes, pH 7.7, 1mM EDTA, 1 mM  
655 neocuproine) for 30 min. Free GSNO or GSH was removed using Zeba Spin Desalting Columns  
656 (Thermo, Cat #: 89883). 1  $\mu$ g GST<sup>4CS</sup> and 2  $\mu$ g GST<sup>4CS</sup>-tagged RGA or RGA<sup>C374S</sup> recombinant  
657 proteins immobilized on Glutathione Sepharose. Immobilized beads were incubated with 1  $\mu$ g  
658 His-tagged recombinant proteins in PBS-140N buffer (137 mM NaCl, 2.7 mM KCl, 10 mM  
659 Na<sub>2</sub>PO<sub>4</sub>, 2 mM KH<sub>2</sub>PO<sub>4</sub>, pH 7.4, 0.5% IGEPAL CA-630) for 1 hr at 4°C. For His-GID1a and  
660 His-GID1c, 10  $\mu$ M GA<sub>3</sub> was added. The supernatant was removed after centrifugation at 800  
661 rpm, and the beads were washed six times with precooled PBS-140N buffer. The resin-retained  
662 proteins were analyzed by western blot analysis using anti-His or anti-GST antibodies as  
663 indicated.

#### 664 **Co-immunoprecipitation**

665 Co-immunoprecipitation experiments were performed as previously described (Ren et al., 2013)  
666 with modifications. pWM101-FLAG-RGA, pWM101-FLAG-RGA<sup>C374S</sup>, and pWM101-HA-  
667 SLY1 constructs were transiently expressed in tobacco leaves by agrobacterium-mediated  
668 infiltration (strain GV3101). After cultured for additional three days, tobacco leaves were  
669 incubated with 10  $\mu$ M paclobutrazol for 3 hours and treated with 300  $\mu$ M SNP for another 1 hour.  
670 Tobacco leaves were then ground in liquid nitrogen and extracted in IP buffer (50 mM Tris-HCl,  
671 pH 7.4, 150 mM NaCl, 5% glycerol, 0.1% IGEPAL CA-630) supplemented with Protease  
672 Inhibitor Cocktail. Samples were centrifuged at 13,000 rpm for 20 min at 4°C and the supernatant  
673 was collected. Proteins were incubated with anti-FLAG<sup>®</sup> M2 affinity gel (Sigma, Cat # A2220)  
674 for 2 hours at 4°C. The gel were washed 6 times with IP buffer and proteins were then eluted and  
675 analyzed by immunoblotting.

#### 676 **In vitro S-nitrosylation assay**

677 Analysis of *in vitro* S-nitrosylation was performed essentially as described (Chen et al., 2020).  
678 Approximately 10  $\mu$ g of GST<sup>4CS</sup>-tagged RGA or RGA<sup>C374S</sup> recombinant proteins were incubated  
679 with GSNO or GSH at a final concentration of 200  $\mu$ M in the dark for 30 min. Protein was  
680 precipitated by adding three volumes of cold acetone. The pellet was washed three times with  
681 70% acetone and resuspended in 200  $\mu$ L blocking buffer 1 (250 mM Hepes, pH 7.7, 4 mM  
682 EDTA, 1 mM neocuproine, 2.5% SDS and 200 mM S-methylmethane thiosulfonate). After  
683 incubation at 50°C for 40 min, protein was precipitated by adding three volumes of acetone and  
684 washed with 70% acetone. The pellet is dissolved in 80  $\mu$ L HENS buffer (250 mM Hepes, pH  
685 7.7, 4 mM EDTA, 1 mM neocuproine, 1% SDS), followed by addition of 10  $\mu$ L 500 mM sodium  
686 ascorbate and 10  $\mu$ L of 4 mM biotin-HPDP. The reaction was run for 1 hr at room temperature.  
687 Samples were separated by SDS-PAGE and analyzed by immunoblotting using an anti-biotin  
688 antibody (Cell Signaling Technology, Cat#7075).

#### 689 **In vivo S-nitrosylation assay**

690 Analysis of *in vivo* S-nitrosylation was performed as described (Feng et al., 2013) with minor  
691 modifications. In brief, two-week-old seedlings were ground in liquid nitrogen and extracted

692 HEN/RIPA buffer (250 mM Hepes, pH 7.7, 1mM EDTA, 0.1 mM neocuproine, 1% Triton X-100,  
693 protease inhibitor cocktail, 0.1% SDS and 1% sodium deoxycholate). 300 µg protein was  
694 incubated with blocking buffer at 50°C for 40 min. Protein was precipitated with cold acetone.  
695 The pellet was washed three times with 70% acetone and resuspended in 240 µL of HENS buffer  
696 followed by addition of 30 µL of 500 mM sodium ascorbate and 30 µL of 4 mM biotin-HPDP.  
697 The reaction was run for 1 hr at room temperature. Protein was precipitated with cold acetone,  
698 washed three times with 70% acetone and resuspended in 300 µL HENS buffer. After being  
699 neutralized with 900 µL of neutralization buffer (25 mM HEPES, pH 7.7, 100 mM NaCl, 1 mM  
700 EDTA, and 0.5% Triton X-100), the sample was mixed with 40 µL of streptavidin beads (Thermo  
701 Scientific, Cat #29202) and incubated at 4°C overnight. The beads were washed six times with  
702 washing buffer (25 mM HEPES, pH 7.7, 600 mM NaCl, 1 mM EDTA, and 0.5% Triton X-100).  
703 The proteins were then eluted and analyzed by immunoblotting.

#### 704 **Mass spectrometric analysis of *S*-nitrosylation residues**

705 Mass spectrometric identification of *S*-nitrosylated cysteine residues was carried out as described  
706 (Chen et al., 2020). Approximately 30 µg GST<sup>4CS</sup>-RGA recombinant proteins were labeled with  
707 biotin-maleimide (Sigma-Aldrich, Cat#B1267). The biotinylated protein was digested with  
708 Trypsin (Promega, Cat#V5280) in gel. The Trypsin-digested sample was analyzed by LC-MS/MS  
709 using a Thermo Fisher Finnigan linear ion trap quadrupole mass spectrometer in line with a  
710 Thermo Fisher Finnigan Surveyor MS Pump Plus HPLC system. The raw data was searched  
711 against the GST<sup>4CS</sup>-RGA protein sequence using pFIND searching software. Cysteine  
712 biotinylation (451.200 Da), cysteine carbamidomethylation (57 Da), and methionine oxidation  
713 (15.995 Da) were included in the search as the variable modifications.

714

#### 715 **QUANTIFICATION AND STATISTICAL ANALYSIS**

716 For quantification analyses, the mean and SD were calculated and compared to control and  
717 significance (*P* value) was determined using the two-tailed Student's *t*-test or one-way ANOVA  
718 test (specified in Figure legends). All experiments were repeated at least 3 times, and

719 representative results are shown.

720

721

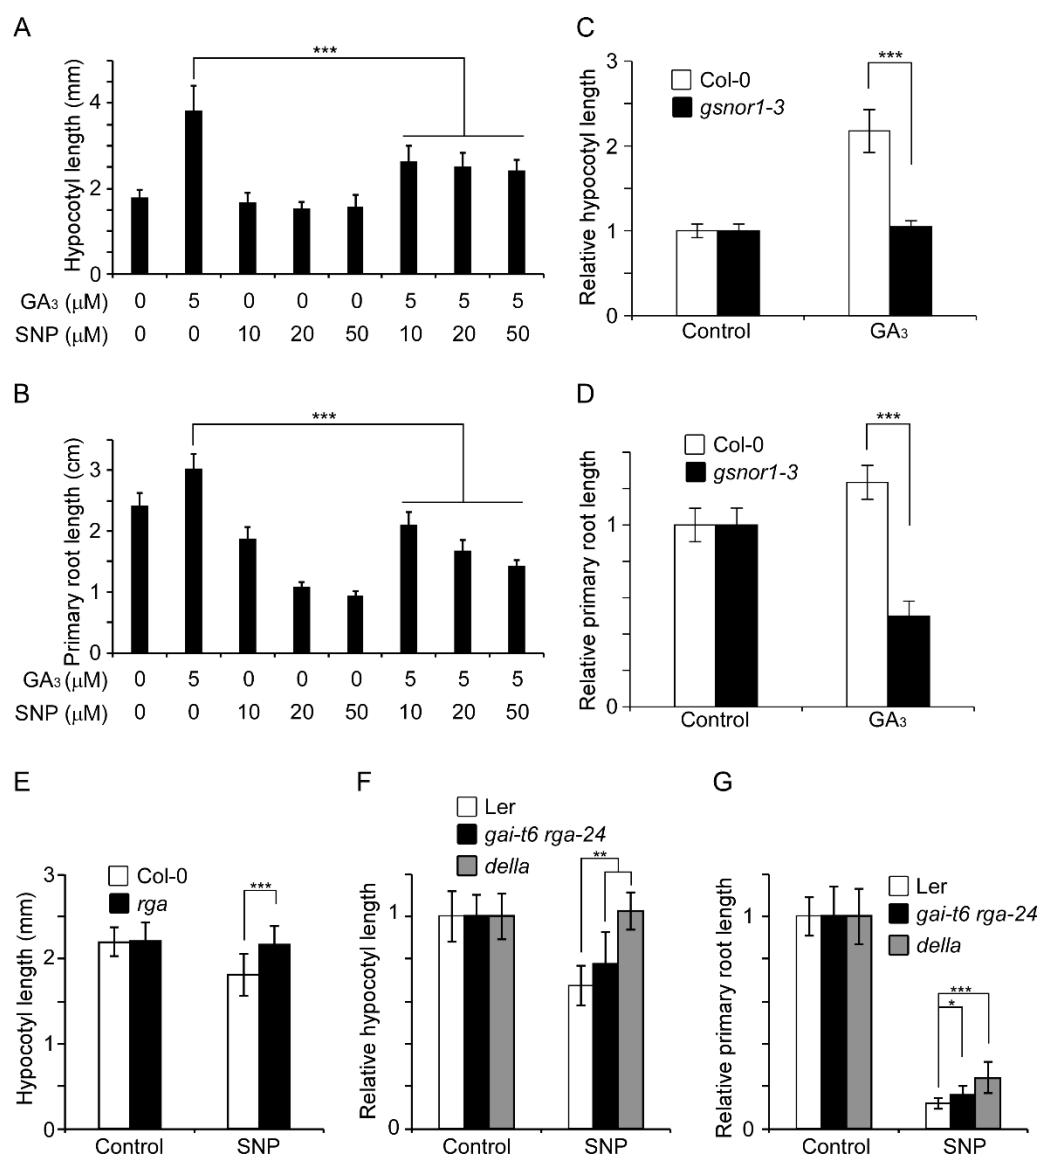

722

723

724 **Figure 1. Nitric oxide antagonizes gibberellin-promoted root and hypocotyl elongation, see**  
 725 **also Supplemental Figure S1 and S2**

726 (A and B) Hypocotyl length (A) and primary root length (B) of 7-day-old Col-0 seedlings treated  
 727 with the indicated concentrations of gibberellic acid (GA<sub>3</sub>) and sodium nitroprusside (SNP).

728 (C and D) Hypocotyl length (C) and primary root length (D) of 7-day-old Col-0 and *gsnor1-3*  
 729 seedlings treated with 5 μM GA<sub>3</sub>.

730 (E) Hypocotyl length of 7-day-old Col-0 and *rga* seedlings treated with 20 μM SNP.



731 (F and G) Hypocotyl length (F) and primary root length (G) of 7-day-old Col-0, *gai-t6 rga-24*  
732 and *della (gai-t6 rga-t2 rgl1-1 rgl2-1)* seedlings treated with 20  $\mu$ M SNP.  
733 In each experiment, 30 seedlings were analyzed. \*, \*\*, and \*\*\* indicate  $P < 0.05$ ,  $P < 0.01$ , and  $P$   
734  $< 0.001$  (one-way ANOVA test), respectively.  
735

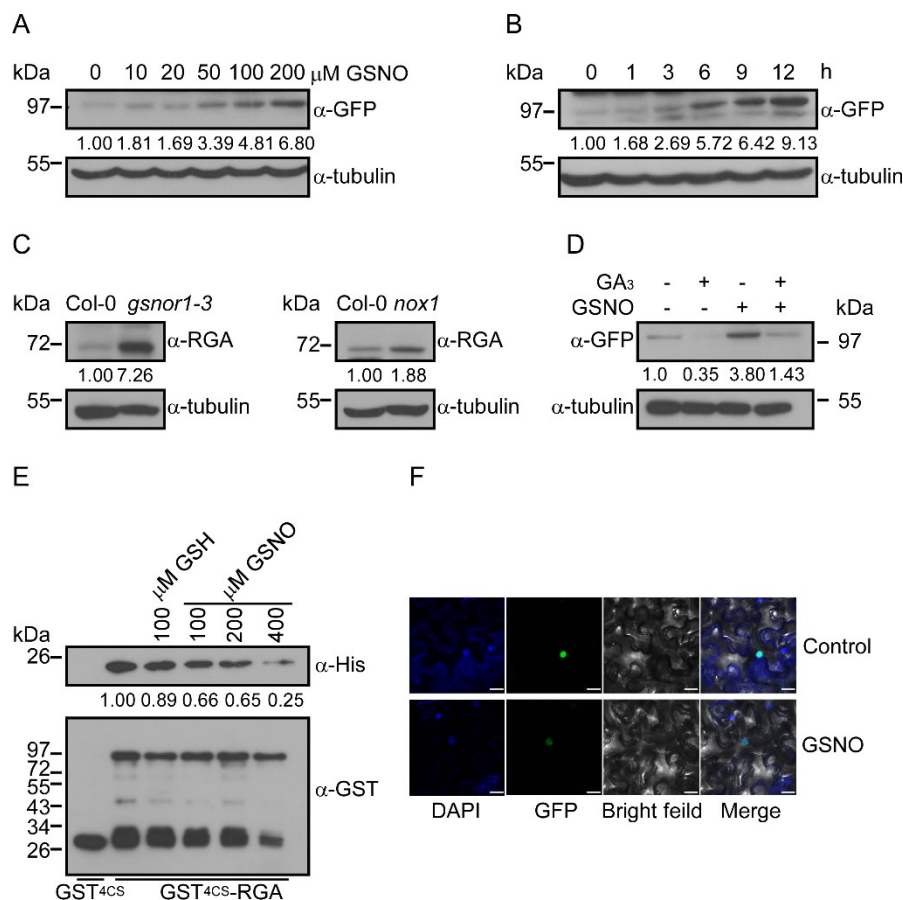

736

737

738 **Figure 2. Nitric oxide inhibits gibberellin-promoted RGA degradation, see also**

739 **Supplemental Figure S3, S4 and Table S1**

740 (A and B) Immunoblotting analysis of GFP-RGA proteins in 7-day-old *pRGA::GFP-RGA*

741 transgenic seedlings treated with indicated concentrations of GSNO for 6 hours (A) and 300 μM

742 GSNO for the indicated times (B) by using an anti-GFP antibody. Immunoblotting with an anti-

743 tubulin antibody is served as a loading control. Quantification of GFP-RGA is shown below the

744 blot.

745 (C) Immunoblotting analysis of RGA proteins in 7-day-old Col-0, *gsnor1-3*, and *nox1* seedlings

746 by using an anti-RGA antibody. Quantification of RGA is shown below the blot.

747 (D) Immunoblotting analysis of GFP-RGA proteins in 7-day-old *pRGA::GFP-RGA* transgenic

748 seedlings treated with or without 300 μM GSNO and 0.5 μM GA<sub>3</sub> for 6 hours using an anti-GFP

749 antibody. Quantification of GFP-RGA is shown below the blot.

750 (E) Analysis of the interaction of SLY1 and RGA1 recombinant proteins with a pull-down assay.  
751 GST<sup>4CS</sup>-RGA protein was treated with the indicated concentrations of GSNO or GSH prior to the  
752 incubation with His-SLY1. Quantification of the His-SLY1 level is shown below the blot.  
753 (F) Bimolecular fluorescence complementation (BiFC) analysis of co-localization of YNE-RGA1  
754 and YCE-SLY1 fusion proteins in transiently expressed in tobacco leaves sprayed with 300  $\mu$ M  
755 GSNO. Bar, 20  $\mu$ m.  
756  
757

758

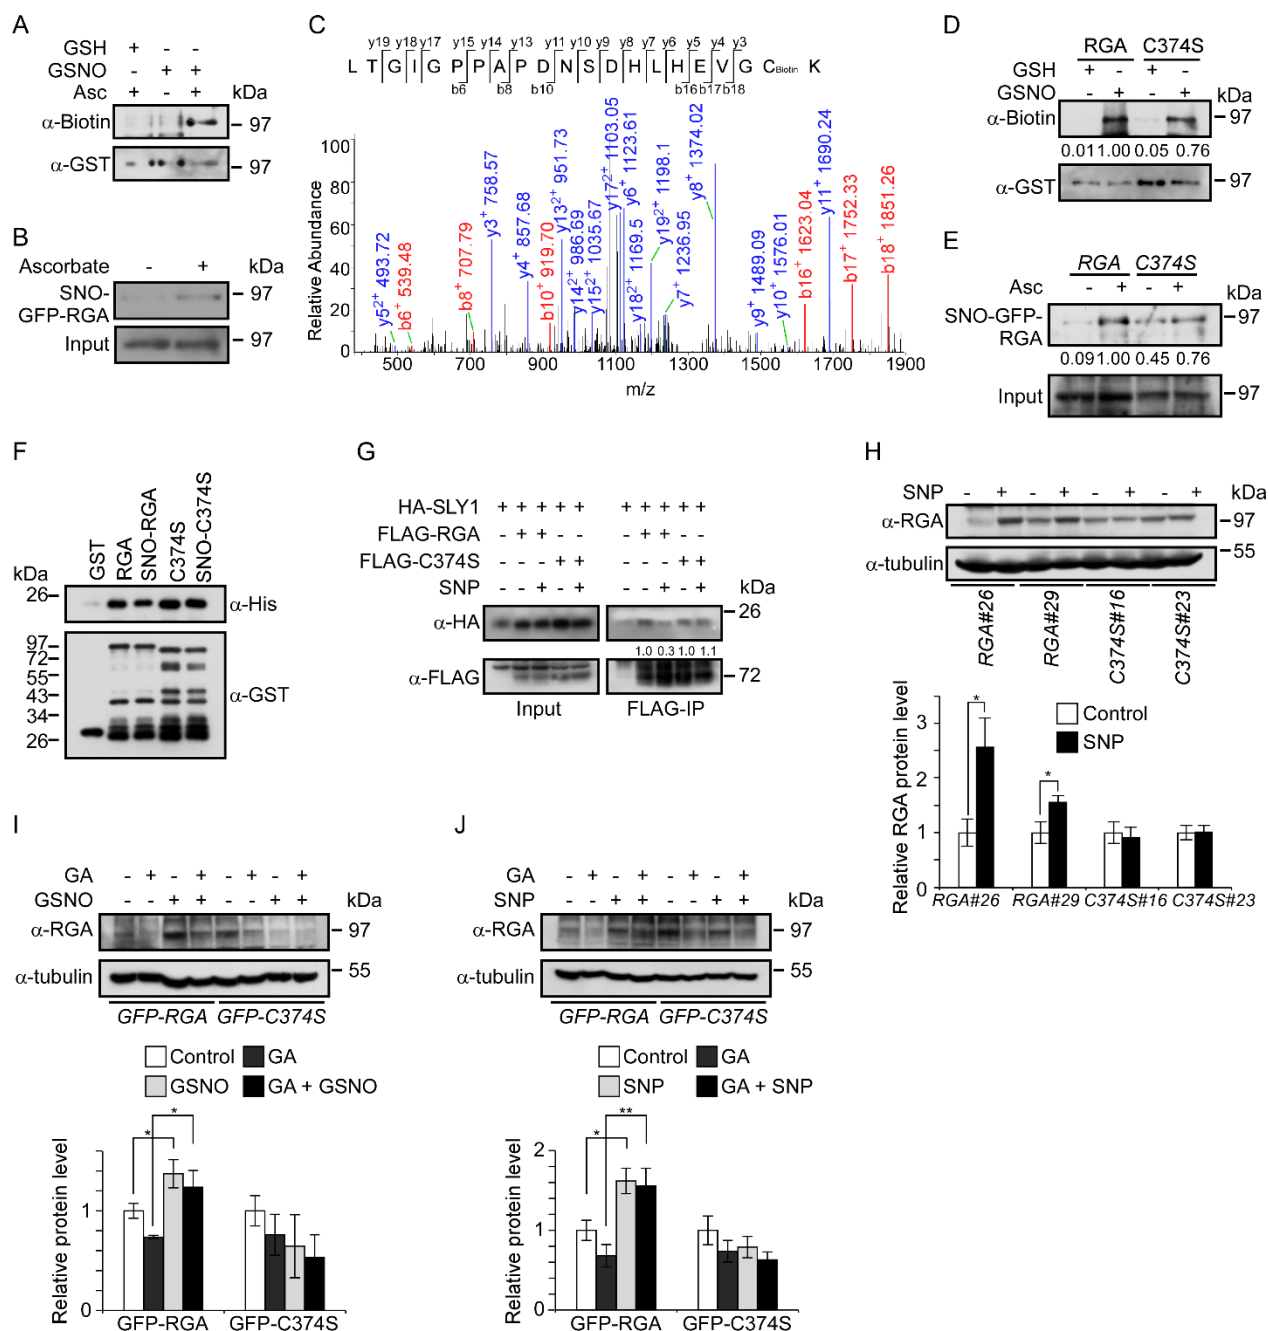

759

760

761 **Figure 3. S-nitrosylation at Cys-374 modulates RGA stability, see also Supplemental Figure**

762 **S4 and S5, Table S1 and Table S2**

763 (A) Analysis of S-nitrosylated GST<sup>4CS</sup>-RGA recombinant protein treated with GSNO by an in

764 vitro S-nitrosylation assay. Treatment with GSH and without sodium ascorbate (Asc) are served

765 as negative controls.

766 (B) Analysis of *S*-nitrosylated GFP-RGA protein in *pRGA::GFP-RGA* transgenic seedlings by an  
767 *in vivo S*-nitrosylation assay. The sample without Asc treatment is served as a negative control.

768 (C) Liquid chromatography tandem-mass (LC-MS/MS) spectrum of trypsin-digested and biotin-  
769 charged RGA peptides. The b- and y-type product ions are indicated, which identified Cys-374 as  
770 an *S*-nitrosylated residue.

771 (D) Analysis of *S*-nitrosylated GST<sup>4CS</sup>-RGA (RGA) and GST<sup>4CS</sup>-RGA<sup>C374S</sup> (C374S) recombinant  
772 proteins treated with GSNO by an *in vitro S*-nitrosylation assay. Treatment with GSH is served as  
773 negative controls. Quantification of the *S*-nitrosylation level of GST<sup>4CS</sup>-RGA and GST<sup>4CS</sup>-  
774 RGA<sup>C374S</sup> is shown below the blot.

775 (E) Analysis of *S*-nitrosylated GFP-RGA and RGA<sup>C374S</sup> (C374S) proteins in planta by an *in vivo*  
776 *S*-nitrosylation assay. The sample without Asc treatment is served as a negative control.

777 Quantification of the *S*-nitrosylation level of RGA and RGA<sup>C374S</sup> is shown below the blot.

778 (F) Analysis of the interaction of RGA, RGA<sup>C374S</sup> and SLY1 recombinant proteins with a pull-  
779 down assay. GST<sup>4CS</sup>-RGA and GST<sup>4CS</sup>-RGA<sup>C374S</sup> was treated with 300 μM GSNO to generate *S*-  
780 nitrosylated proteins prior to the incubation with His-SLY1.

781 (G) Analysis of the interaction of HA-SLY1, FLAG-RGA and FLAG-RGA<sup>C374S</sup> (FLAG-C374S)  
782 proteins by a co-immunoprecipitation assay. The *HA-SLY1* and *FLAG-RGA* fusion genes under  
783 the control of the 35S promoter were transiently expressed in tobacco leaves that were incubated  
784 with or without 300 μM SNP for 1 hour. Protein extracts were used for Co-IP and analyzed by  
785 immunoblotting using anti-HA and -FLAG antibodies. Quantification of HA-SLY1 is shown  
786 below the blot. And protein level of HA-SLY1 that interacts with FLAG-RGA and FLAG-C374S  
787 without SNP treatment is set as 1.0, respectively.

788 (H) Immunoblotting analysis of GFP-RGA proteins in *gai-t6 rga-24* transgenic seedlings of the  
789 indicated genotypes treated with 300 μM SNP for 6 hours using an anti-RGA antibody.

790 Quantification of the GFP-RGA and GFP-RGA<sup>C374S</sup> protein levels is shown below the blot.

791 Protein levels of GFP-RGA and GFP-RGA<sup>C374S</sup> without treatment are set as 1.0, respectively.

792 (I) Immunoblotting analysis of GFP-RGA and GFP-RGA<sup>C374S</sup> proteins in 7-day-old *pRGA::GFP-*  
793 *RGA*, *pRGA::GFP-RGA<sup>C374S</sup>* transgenic seedlings treated with or without 300 μM GSNO and 0.5  
794 μM GA<sub>3</sub> for 6 hours by using an anti-RGA antibody. Quantification of the GFP-RGA and GFP-  
795 RGA<sup>C374S</sup> protein levels is shown below the blot. Protein levels of GFP-RGA and GFP-  
796 RGAC374S without treatment are set as 1.0, respectively.

797 (J) Immunoblotting analysis of GFP-RGA and GFP-RGA<sup>C374S</sup> proteins in 7-day-old *pRGA::GFP-*  
798 *RGA*, *pRGA::GFP-RGA<sup>C374S</sup>* transgenic seedlings treated with or without 300 μM SNP, and 0.5  
799 μM GA<sub>3</sub> for 6 hours by using an anti-RGA antibody. Quantification of the GFP-RGA and GFP-  
800 RGA<sup>C374S</sup> protein levels is shown below the blot. Protein levels of GFP-RGA and GFP-RGA<sup>C374S</sup>  
801 without treatment are set as 1.0, respectively.

802 Data presented in (H)-(J) are means of three independent experiments with S.D. \* and \*\* indicate  
803  $P < 0.05$  and  $P < 0.01$ , respectively (One-way ANOVA test).

804

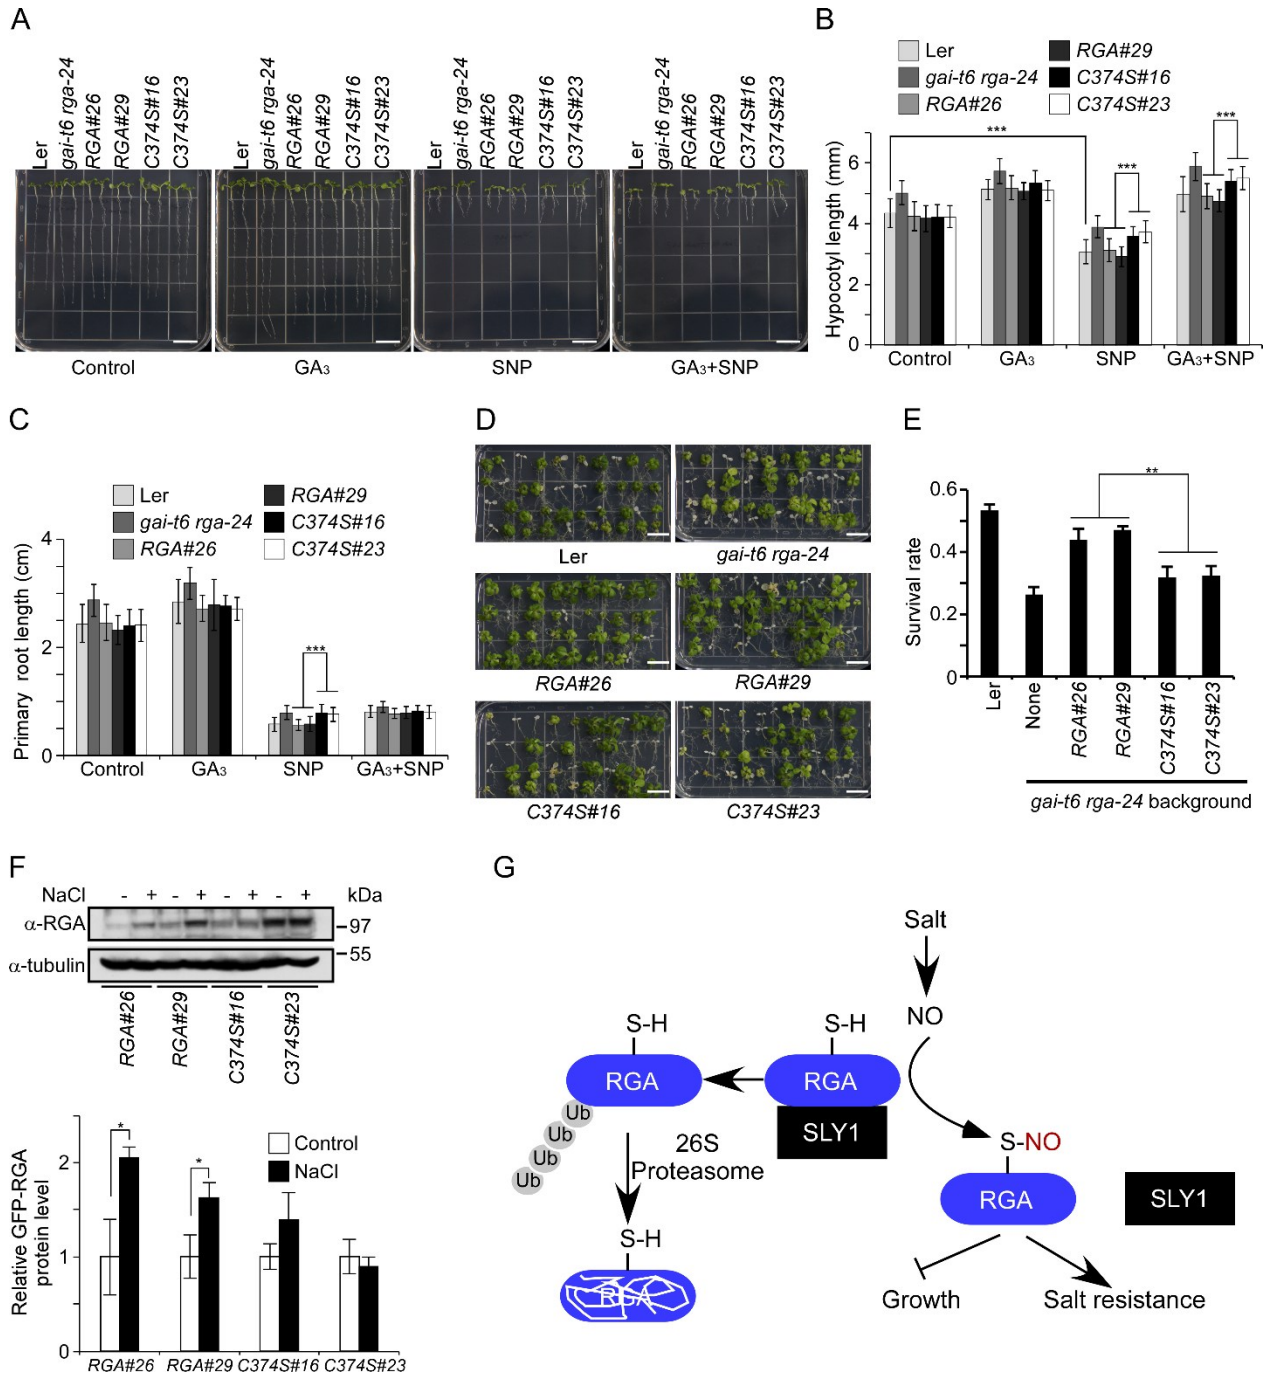

811 (B) and (C) Analysis of hypocotyl length (B) and primary root length (C) of transgenic seedlings  
812 of the indicated genotypes treated with 50  $\mu$ M SNP or 5  $\mu$ M GA<sub>3</sub> for 10 days.  
813 (D) Five-day-old seedlings of the indicated genotypes on 1/2MS medium were transferred to the  
814 medium containing 125 mM NaCl. Photos were taken 2 weeks post the transfer. Bar, 1 cm.  
815 (E) Analysis of the survival rate of transgenic seedlings of the indicated genotypes shown in (D).  
816 (F) Immunoblotting analysis of GFP-RGA proteins in *gai-t6 rga-24* transgenic seedlings of the  
817 indicated genotypes treated with 150 mM NaCl for 6 hours using an anti-RGA antibody.  
818 Quantification of the GFP-RGA and GFP-RGA<sup>C374S</sup> protein levels is shown below the blot.  
819 (G) A proposed model illustrating the function of *S*-nitrosylation of RGA. Under normal growth  
820 conditions, SLY1 interacts with RGA, which leads to the polyubiquitination and degradation of  
821 RGA via the 26S proteasome pathway. High salt induces the NO burst, which subsequently  
822 induces the *S*-nitrosylation of RGA. The *S*-nitrosylation inhibits the RGA-SLY1 interaction and  
823 enhances the stability of RGA. Accumulating RGA inhibits plant growth and enhance the salinity  
824 tolerance.  
825  $\geq 30$  seedlings are analyzed for each sample in (B) and (C). Data presented in (E) and (F) are  
826 means of three independent experiments with S.D. \* and \*\* indicate  $P < 0.05$  and  $P < 0.01$ ,  
827 respectively (One-way ANOVA test).  
828



829

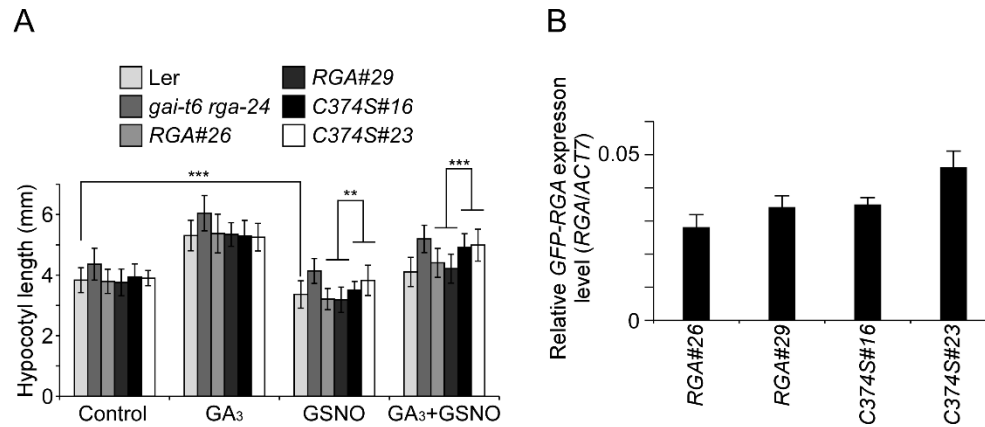

830

831

832 **Figure S1 S-nitrosylation of RGA modulates plant growth, related to Figure 1 and 4**

833 (A) Analysis of hypocotyl length of transgenic seedlings of the indicated genotypes treated with  
834 300  $\mu$ M GSNO or 5  $\mu$ M GA<sub>3</sub> for 10 days. Thirty seedlings were analyzed. \*, \*\*, and \*\*\* indicate  
835  $P < 0.05$ ,  $P < 0.01$ , and  $P < 0.001$  (one-way ANOVA test), respectively.

836 (B) Analysis of the expression of *GFP-RGA* by qRT-PCR in 7-day-old transgenic seedlings.

837

838

839

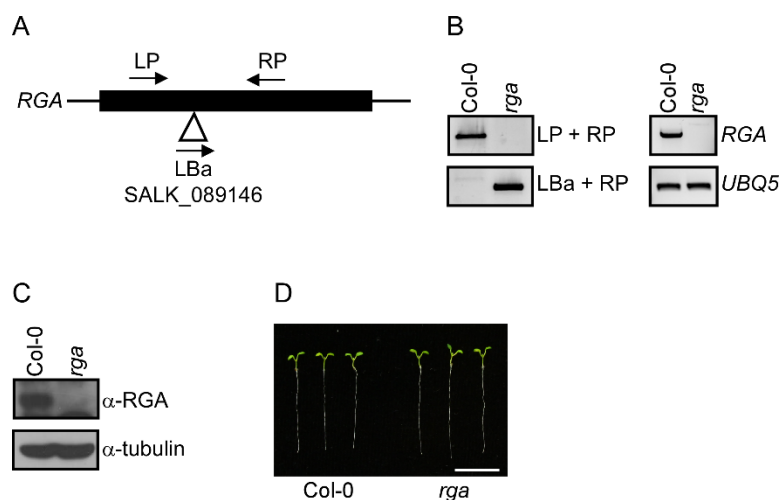

840

841

842 **Figure S2. Characterization of *rga* mutant, related to Figure 1**

843 (A) The gene structure is indicated with exons represented by boxes and UTRs represented by lines.

844 The position of T-DNA is indicated with open triangle.

845 (B) Genotyping of *rga* mutant.

846 (C) Analysis of *RGA* expression by RT-PCR. *RGA* expression in Col-0 and the *rga* mutant is shown.

847 *UBQ5* was used as loading control.

848 (D) Analysis of RGA protein level in Col-0 and the *rga* mutant. Total protein was extracted from

849 7-day-old seedlings and probed with anti-RGA and anti-tubulin antibodies.

850 (E) Seven-day-old seedlings of Col-0 and *rga* mutant. Bar, 1 cm.

851

852

853

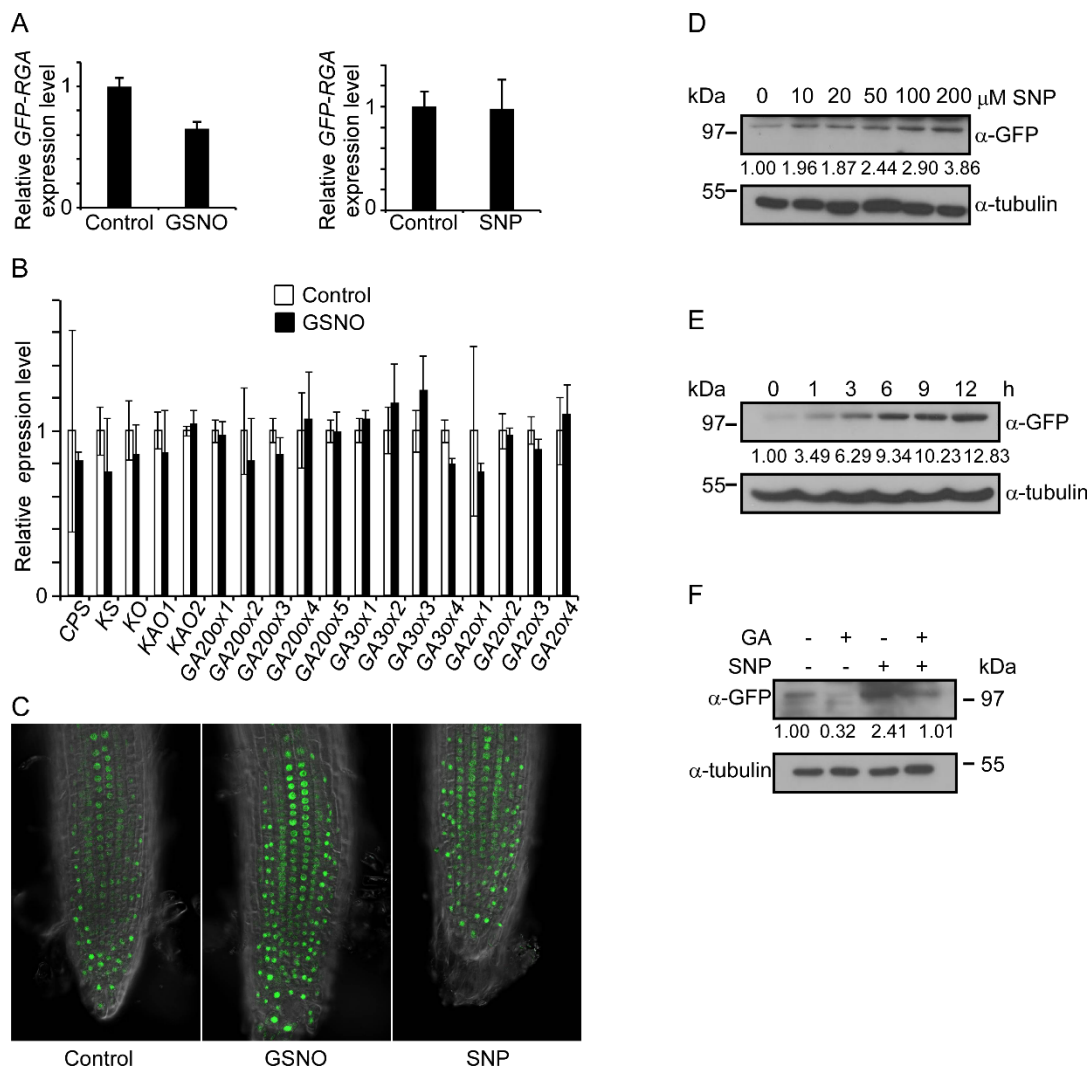

854

855

856 **Figure S3. NO inhibits GA-promoted RGA degradation, related to Figure 2**

857 (A) Analysis of the expression of *GFP-RGA* by qRT-PCR in 7-day-old *pRGA::GFP-RGA*

858 transgenic plants treated with 300  $\mu$ M GSNO or SNP for 6 hours.

859 (B) Analysis of the expression of GA biosynthesis genes by qRT-PCR in 7-day-old Col-0 seedlings

860 treated with 300  $\mu$ M GSNO for 6 hours.

861 (C) Confocal microscopic images of root tips derived from *pRGA::GFP-RGA* transgenic seedlings

862 treated with 300  $\mu$ M GSNO or SNP.

863 (D and E) Immunoblotting analysis of GFP-RGA proteins in 7-day-old *pRGA::GFP-RGA*

864 transgenic plants treated with indicated concentrations of SNP for 6 hours (D) and 300  $\mu$ M SNP  
865 for indicated times (E) using an anti-GFP antibody, and immunoblotting with an anti-tubulin  
866 antibody is served as loading control. Quantification of GFP-RGA is shown below the blot.  
867 (F) Immunoblotting analysis of GFP-RGA proteins in 7-day-old *pRGA::GFP-RGA* transgenic  
868 plants treated with or without 300  $\mu$ M SNP or 0.5  $\mu$ M GA for 6 hours using an anti-GFP antibody.  
869 Quantification of GFP-RGA is shown below the blot.  
870

871

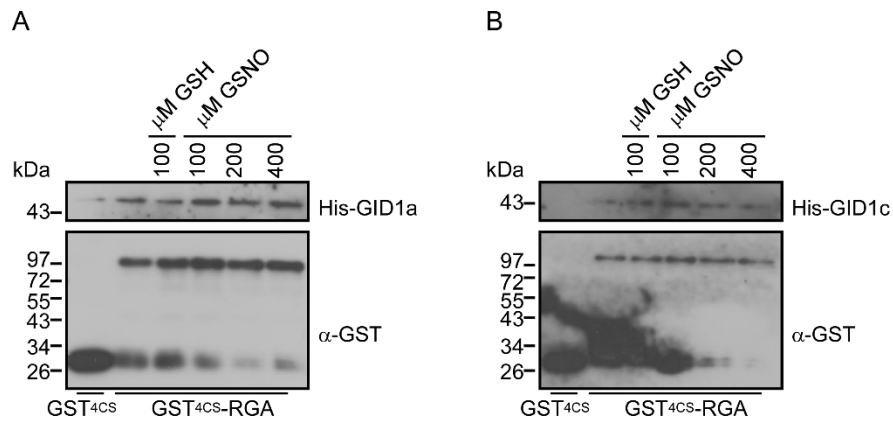

872

873

874 **Figure S4 RGA-GID1 interaction is not regulated by NO, related to Figure 2**

875 (A and B) Analysis of the interaction of His-GID1a (A), His-GID1c (B) with GST<sup>4CS</sup>-RGA

876 recombinant proteins with a GST pull-down assay. GST<sup>4CS</sup>-RGA protein was treated with

877 indicated concentrations of GSNO or GSH before incubated with His-GID1a or His-GID1c.

878

879

880

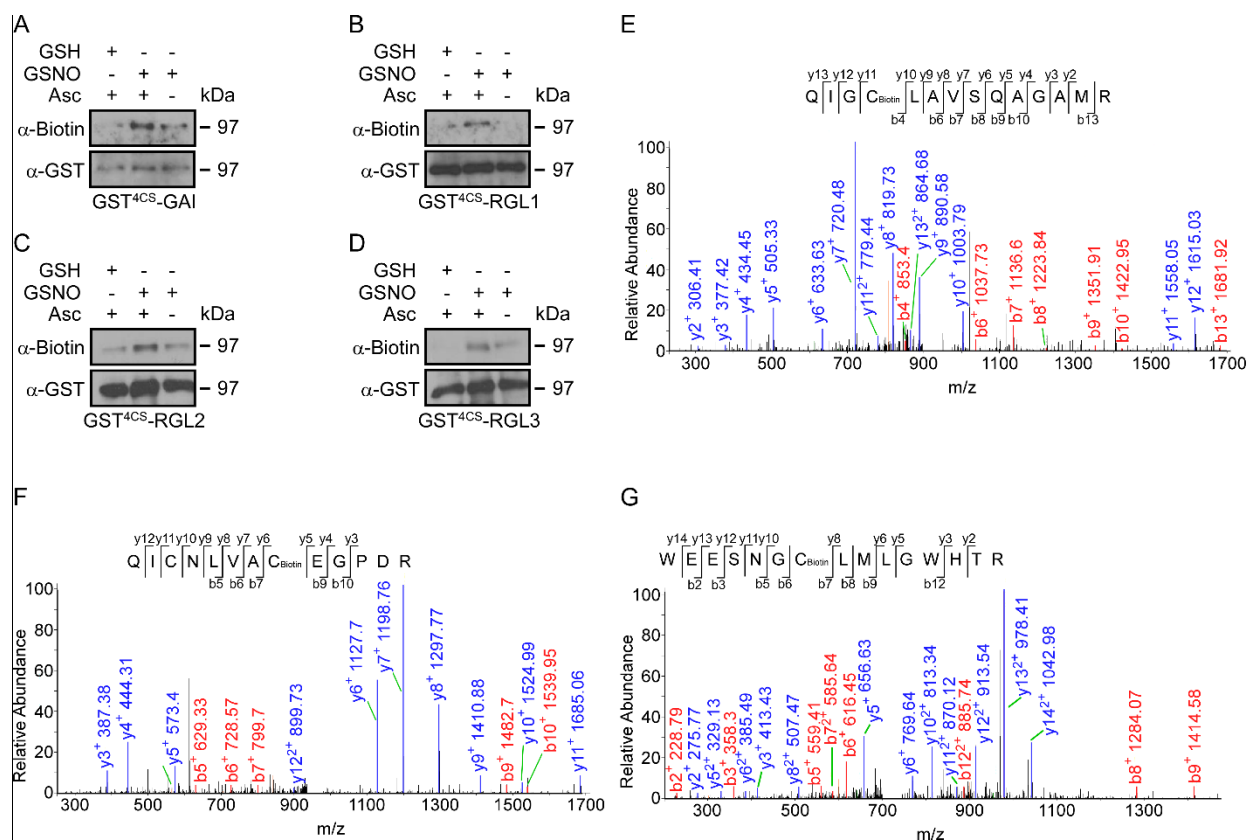

881

882

883 **Figure S5 DELLA proteins are S-nitrosylated in vitro, related to Figure 3**

884 (A to D) Analysis of S-nitrosylated GST<sup>4CS</sup>-GAI (A), GST<sup>4CS</sup>-RGL1 (B), GST<sup>4CS</sup>-RGL2 (C), and  
885 GST<sup>4CS</sup>-RGL3 (D) recombinant proteins treated with GSNO by an in vitro S-nitrosylation assay.

886 Treatment with GSH and without sodium ascorbate (Asc) are served as negative controls.

887 (E to G) Liquid chromatography tandem-mass (LC-MS/MS) spectrum of trypsin-digested and

888 biotin-charged RGA peptides. The b- and y-type product ions are indicated, which identified Cys-

889 249 (E), Cys-506 (F), and Cys-564 (G) as an S-nitrosylated residues.

890

891

892

**Table S1 Primers used in this study, related to Figures 2, 3 and 4.**

893

| Primer          | Sequences (5' to 3')            | Experiments                        |
|-----------------|---------------------------------|------------------------------------|
| SLY1 GSTHIS F1  | ggatccATGAAGCGCAGTACTACCGACTC   | pET28a-SLY1                        |
| SLY1 GSTHIS B1  | aagcttTTTGGATTCTGGAAGAGGTCTCT   | pET28a-SLY1                        |
| GID1a GSTHIS F1 | ggatccATGGCTGCGAGCGATGAAGTTAATC | pET28a-GID1a                       |
| GID1a GSTHIS B1 | gtcgacACATCCGCGTTTACAAACGCCG    | pET28a-GID1a                       |
| GID1c GSTHIS F1 | ggatccATGGCTGGAAGTGAAGAAGTTAATC | pET28a-GID1c                       |
| GID1c GSTHIS B1 | gtcgacTTGGCATTCTGCGTTTACAAATGC  | pET28a-GID1c                       |
| RGA GSTHIS F1   | GGATCCATGAAGAGAGATCATCACC AAT   | pGEX4T14CS-RGA                     |
| RGA GSTHIS B1   | GTCGACGTACGCCGCCGTCGAGAGTTTC    | pGEX4T14CS-RGA                     |
| GAI GSTHIS F1   | GGATCCATGAAGAGAGATCATCATCA      | pGEX4T14CS-GAI                     |
| GAI GSTHIS B1   | GTCGACATTGGTGGAGAGTTTCCAAGCCG   | pGEX4T14CS-GAI                     |
| RGL1 GSTHIS F1  | GGATCCATGAAGAGAGAGCACAACCACC    | pGEX4T14CS-RGL1                    |
| RGL1 GSTHIS B1  | GTCGACTTCCACACGATTGATTCGCCAC    | pGEX4T14CS-RGL1                    |
| RGL2 GSTHIS F1  | GTCGACAAATGAAGAGAGGATACGGAGAA   | pGEX4T14CS-RGL2                    |
| RGL2 GSTHIS B1  | CGGCCGGGCGAGTTTCCACGCCGAGGTTG   | pGEX4T14CS-RGL2                    |
| RGL3 GSTHIS F1  | GTCGACAAATGAAACGAAGCCATCAAGAA   | pGEX4T14CS-RGL3                    |
| RGL3 GSTHIS B1  | CGGCCGCCGCCGCAACTCCGCCGCTAGTT   | pGEX4T14CS-RGL3                    |
| RGA NT B2       | cagctgTCCTATGACTCCACCAATCTG     | pET28a-RGA NT                      |
| RGA Pro F1      | CTCGAGCATGGTTTTGCATGGAAGAAATA   | pER8-pRGA::GFP-RGA                 |
| RGA Pro B1      | CCATGGTTTTCAGCTATGAGTTTCGATT    | pER8-pRGA::GFP-RGA                 |
| RGA genome F1   | CTGCAGCCAAGAGAGATCATCACC AATTC  | pER8-pRGA::GFP-RGA                 |
| RGA genome B1   | ACTAGTGTACTCTTTGTAACAATAGTTAT   | pER8-pRGA::GFP-RGA                 |
| RGA 35SFLAG F1  | GGTACCATGGATTACAAGGATGACGACGA   | pWM101-FLAG-RGA                    |
| RGA 35SFLAG B1  | GTCGACTCAGTACGCCGCCGTCGAGAGTT   | pWM101-FLAG-RGA                    |
| SLY1 N MYCHA F1 | aagcttAAGCGCAGTACTACCGACTCTGA   | pWM101-HA-SLY1                     |
| SLY1 N MYCHA B1 | ctgcagTTATTTGGATTCTGGAAGAGGTC   | pWM101-HA-SLY1                     |
| SLY1 35SHA F1   | ggtaccATGTATCCTTATGATGTTCCAG    | pWM101-HA-SLY1                     |
| RGA C374S F1    | TGAAGTTGGTgGTAAATTAGCTCAGCT     | <i>RGA</i> <sup>C374S</sup> mutant |
| RGA C374S B1    | GAGCTAATTTACtACCAACTTCATGAAG    | <i>RGA</i> <sup>C374S</sup> mutant |
| SALK_089146 LP  | CCATCACCACCATTCTTTTTC           | Identification of <i>rga</i>       |
| SALK_089146 RP  | TGGACTAAACGAACACCGTTC           | Identification of <i>rga</i>       |
| ACT7F           | GGAAGTGAATGGTGAAGGCTG           | qRT-PCR                            |
| ACT7B           | CGATTGGATACTTCAGAGTGAGGA        | qRT-PCR                            |
| RGA qRT F1      | CGGGACTTCTTCTTCATCATC           | qRT-PCR                            |
| RGA qRT B1      | TGAACATTACTCATCATCGTC           | qRT-PCR                            |
| CPS qRT F2      | CAGTTCTACTAAAACAACAATA          | qRT-PCR                            |
| CPS qRT B2      | CTCTTCACTGCTTCTTTGAAT           | qRT-PCR                            |
| KS qRT F1       | ACCTTCGCTCCTCCGGTTG             | qRT-PCR                            |

|                |                          |         |
|----------------|--------------------------|---------|
| KS qRT B1      | AGATCCATCTTCATGTTGATTAT  | qRT-PCR |
| KO qRT F1      | CATTCTCCTTGGCTTTGTTATC   | qRT-PCR |
| KO qRT B1      | GTCTCAGTAGAATTGAGGAC     | qRT-PCR |
| KAO1 qRT F1    | CTGATGGTGTGGGATGTTTTG    | qRT-PCR |
| KAO1 qRT B1    | TGTTACTATTATACTTGGGTTC   | qRT-PCR |
| KAO2 qRT F1    | GCTGAAGAGAGTGAATGTTTG    | qRT-PCR |
| KAO2 qRT B1    | CTGTTAGAACTCGCTACAAG     | qRT-PCR |
| GA20ox1 qRT F1 | TTCACCGGACGCTTCTCCAC     | qRT-PCR |
| GA20ox1 qRT B1 | GGTAGTAATTCAGTCTCATTATTG | qRT-PCR |
| GA20ox2 qRT F2 | GCAGATTCTCCACTAAGCT      | qRT-PCR |
| GA20ox2 qRT B2 | ATGATTGAGCCTCATTATCGAAT  | qRT-PCR |
| GA20ox3 qRT F2 | AGTTTCGTCGGGAGATTCT      | qRT-PCR |
| GA20ox3 qRT B2 | TCAACCGGAATATTGAATCGC    | qRT-PCR |
| GA20ox4 qRT F2 | TCAAGGAGAATCTCCGTGG      | qRT-PCR |
| GA20ox4 qRT B2 | GATACCAAGACTCATTCCAAG    | qRT-PCR |
| GA20ox5 qRT F1 | GTGGAATGAGACTTTGACTTTGG  | qRT-PCR |
| GA20ox5 qRT B1 | AGGGCTTCTCTGGCTGC        | qRT-PCR |
| GA3ox1 qRT F2  | GCGTCGCTCGTATCGCATC      | qRT-PCR |
| GA3ox1 qRT B2  | GCCCAGTTTAAATCTGAAC      | qRT-PCR |
| GA3ox2 qRT F2  | TCGTTCTTTAATAAGAAGATGTG  | qRT-PCR |
| GA3ox2 qRT B2  | GGATAATGGTTTAGTTGGATA    | qRT-PCR |
| GA3ox3 qRT F2  | GAACCGTGACCGGATCATCC     | qRT-PCR |
| GA3ox3 qRT B2  | AGCCTCTTCATTTGGCAATCA    | qRT-PCR |
| GA3ox4 qRT F1  | GGCTACGGAGAACCCTCGAAT    | qRT-PCR |
| GA3ox4 qRT B1  | GATCCAGATTTCTCTAGCTTGTG  | qRT-PCR |
| GA2ox1 qRT F2  | GGAACAGTAAGATTGGTCGG     | qRT-PCR |
| GA2ox1 qRT B2  | CTGTGATCTTCTCCAAAAC      | qRT-PCR |
| GA2ox2 qRT F1  | GTACGGTTATGGTAATAAACGG   | qRT-PCR |
| GA2ox2 qRT B1  | GCTCTATCCCTAGTTCTTCG     | qRT-PCR |
| GA2ox3 qRT F2  | TGGTGACCTTGGCTGGCTTG     | qRT-PCR |
| GA2ox3 qRT B2  | CTCAGGCACGAATCACTTTCT    | qRT-PCR |
| GA2ox4 qRT F1  | CTCACGAGAAGAAATCTGTCC    | qRT-PCR |
| GA2ox4 qRT B1  | GACATGAAGTCCCTCAGCCG     | qRT-PCR |

894

895

896



897

898

**Table S2 *S*-nitrosylated residues of RGA, related to Figure 3**

899

| <b><i>S</i>-nitrosylated residues identified in<br/>mass spectrometry</b> | <b>Repeat 1</b> | <b>Repeat 2</b> |
|---------------------------------------------------------------------------|-----------------|-----------------|
| Cys-249                                                                   | √               | √               |
| Cys-374                                                                   | √               | √               |
| Cys-506                                                                   | √               |                 |
| Cys-564                                                                   | √               | √               |

900

901
